# Supplementary material for: sp2–sp cross-carbanion coupling at a rare-earth center leading to the formation of carbon–carbon double bonds
Source: Royal Society of Chemistry journal article supplement (doi:10.1039/d4qi00178h), 2024-01-01
Supplement: d4qi00178h1.pdf [file d4qi00178h1.pdf]

## Cover Page for Supporting Information

### *Manuscript Title:*

sp<sup>2</sup>-sp Cross-Carbanion Coupling at a Rare-Earth Center Leading to the Formation of Carbon-Carbon Double Bonds

### *Authors:*

Zhengqi Chai, Ze-Jie Lv, Wei Liu, Jinxiao Yang, Junnian Wei, and Wen-Xiong Zhang\*

### *Affiliations:*

Beijing National Laboratory for Molecular Sciences (BNLMS), State Key Laboratory of Rare Earth Materials Chemistry and Applications & Key Laboratory of Bioorganic Chemistry and Molecular Engineering of Ministry of Education, College of Chemistry and Molecular Engineering, Peking University, Beijing 100871, China

### *Contents:*

|                                                                      |            |
|----------------------------------------------------------------------|------------|
| <b>1) Experimental Details and Characterization Data</b>             | <b>S2</b>  |
| <b>2) Copies of <sup>1</sup>H NMR and <sup>13</sup>C NMR Spectra</b> | <b>S6</b>  |
| <b>3) X-ray Crystallographic Studies</b>                             | <b>S11</b> |
| <b>4) Details of DFT Calculations</b>                                | <b>S18</b> |
| <b>5) References</b>                                                 | <b>S43</b> |



26.0 ( $\beta$ -C for THF), 26.6 ((CH<sub>3</sub>)<sub>2</sub>CH), 27.0 ((CH<sub>3</sub>)<sub>2</sub>CH), 27.1 ((CH<sub>3</sub>)<sub>2</sub>CH), 27.3 ((CH<sub>3</sub>)<sub>2</sub>CH), 47.5 ((CH<sub>3</sub>)<sub>2</sub>CH), 47.8 ((CH<sub>3</sub>)<sub>2</sub>CH), 54.9 (NCH<sub>2</sub>CH<sub>2</sub>O), 68.4 ( $\alpha$ -C for THF), 68.6 (NCH<sub>2</sub>CH<sub>2</sub>O), 71.5 (OCH<sub>2</sub>CH<sub>2</sub>O), 94.2 (LuC=C=C), 100.3 (LuNH-C=C), 113.4 (C<sub>5</sub>Me<sub>5</sub>), 118.9 (Ar), 120.7 (Ar), 121.3 (Ar), 125.1 (Ar), 126.4 (Ar), 126.8 (Ar), 127.7 (Ar), 127.9 (Ar), 127.9 (Ar), 127.9 (Ar), 130.6 (Ar), 130.9 (LuC), 131.3 (Ar), 145.0 (Ar), 146.4 (Ar), 147.4 (Ar), 151.8 (Ar), 155.6 (LuNH-C), 160.5 (LuC=C), 171.2 (NCN). Anal. Calcd for C<sub>65</sub>H<sub>89</sub>KLuN<sub>5</sub>O<sub>6</sub> of **3a**: C, 62.43; H, 7.17; N, 5.60; Found: C, 61.88; H, 7.39; N, 5.54.

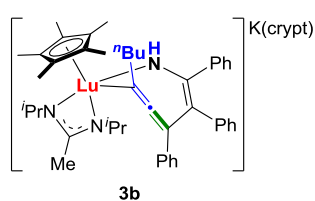

**Synthesis of 3b:** This complex was prepared by an analogous procedure as the synthesis of **3a**, except that phenylacetylene (5.5  $\mu$ L, 0.050 mmol) was replaced by 1-hexyne (5.7  $\mu$ L, 0.050 mmol). **3b**, yellow solid. Yield: 81% (49.8 mg, 0.041 mmol). The suitable crystals for X-ray diffraction of **3b** could be obtained through gradually diffusing hexane into its THF solution at room temperature. <sup>1</sup>H NMR (400 MHz, THF-*d*<sub>8</sub>) of **3b**:  $\delta$  0.81 (s, 3H, CCH<sub>3</sub>), 0.87-0.92 (m, 9H, (CH<sub>3</sub>)<sub>2</sub>CH and CH<sub>3</sub>(CH<sub>2</sub>)<sub>3</sub>), 1.27-1.30 (m, 6H, (CH<sub>3</sub>)<sub>2</sub>CH), 1.42-1.55 (m, 2H, CH<sub>3</sub>CH<sub>2</sub>(CH<sub>2</sub>)<sub>2</sub>), 1.58-1.65 (m, 2H, CH<sub>3</sub>CH<sub>2</sub>CH<sub>2</sub>CH<sub>2</sub>), 1.99 (s, 15H, C<sub>5</sub>Me<sub>5</sub>), 2.42 (t, *J* = 6.7 Hz, 2H, CH<sub>3</sub>(CH<sub>2</sub>)<sub>2</sub>CH<sub>2</sub>), 2.53 (t, *J* = 4.7 Hz, 12H, NCH<sub>2</sub>CH<sub>2</sub>O), 3.25-3.33 (m, 2H, (CH<sub>3</sub>)<sub>2</sub>CH), 3.51 (t, *J* = 4.7 Hz, 12H, NCH<sub>2</sub>CH<sub>2</sub>O), 3.55 (s, 12H, OCH<sub>2</sub>CH<sub>2</sub>O), 4.30 (s, 1H, NH), 6.16-6.20 (m, 1H, Ar), 6.33-6.37 (m, 1H, Ar), 6.41-6.45 (m, 2H, Ar), 6.64-6.66 (m, 4H, Ar), 6.87-6.91 (m, 1H, Ar), 6.94-6.98 (m, 2H, Ar), 7.14-7.16 (br, 4H, Ar). <sup>13</sup>C NMR (151 MHz, THF-*d*<sub>8</sub>) of **3b**:  $\delta$  11.6 (CCH<sub>3</sub>), 13.0 (C<sub>5</sub>Me<sub>5</sub>), 15.0 (CH<sub>3</sub>(CH<sub>2</sub>)<sub>3</sub>), 23.3 (CH<sub>3</sub>CH<sub>2</sub>(CH<sub>2</sub>)<sub>2</sub>), 27.0 ((CH<sub>3</sub>)<sub>2</sub>CH), 27.1 ((CH<sub>3</sub>)<sub>2</sub>CH), 30.7 (CH<sub>3</sub>CH<sub>2</sub>CH<sub>2</sub>CH<sub>2</sub>), 37.1 (CH<sub>3</sub>(CH<sub>2</sub>)<sub>2</sub>CH<sub>2</sub>), 47.4 ((CH<sub>3</sub>)<sub>2</sub>CH), 47.6 ((CH<sub>3</sub>)<sub>2</sub>CH), 54.9 (NCH<sub>2</sub>CH<sub>2</sub>O), 68.6 (NCH<sub>2</sub>CH<sub>2</sub>O), 71.5 (OCH<sub>2</sub>CH<sub>2</sub>O), 94.0 (LuC=C=C), 101.3 (LuNH-C=C), 112.8 (C<sub>5</sub>Me<sub>5</sub>), 118.6 (Ar), 119.5 (Ar), 124.8 (Ar), 126.3 (Ar), 126.6 (Ar), 127.1 (Ar), 127.7 (Ar), 127.8 (Ar), 130.7 (LuC), 131.0 (Ar), 147.7 (Ar), 148.3 (Ar), 152.0 (Ar), 155.5 (LuNH-C), 159.4 (LuC=C), 171.0 (NCN). Anal. Calcd for C<sub>63</sub>H<sub>93</sub>KLuN<sub>5</sub>O<sub>6</sub> of **3b**: C, 61.49; H, 7.62; N, 5.69; Found: C, 61.16; H, 7.58; N, 5.49.

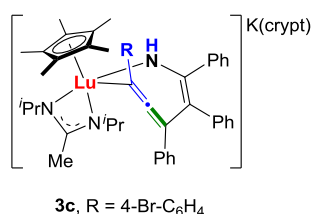

**Synthesis of 3c:** This complex was prepared by an analogous procedure as the synthesis of **3a**, except that phenylacetylene (5.5  $\mu$ L, 0.050 mmol) was replaced by 4-bromophenylacetylene (9.1 mg, 0.050 mmol). **3c**, orange solid. Yield: 75% (49.8 mg, 0.038 mmol). The suitable crystals for X-ray diffraction of **3c**·THF could be

obtained through gradually diffusing hexane into its THF solution at room temperature.  $^1\text{H}$  NMR (400 MHz, THF- $d_8$ ) of **3c**:  $\delta$  0.83 (s, 3H, CCH<sub>3</sub>), 0.95 (d,  $J$  = 6.2 Hz, 6H, (CH<sub>3</sub>)<sub>2</sub>CH), 1.35 (d,  $J$  = 6.5 Hz, 3H, (CH<sub>3</sub>)<sub>2</sub>CH), 1.44 (d,  $J$  = 6.4 Hz, 3H, (CH<sub>3</sub>)<sub>2</sub>CH), 1.91 (s, 15H, C<sub>5</sub>Me<sub>5</sub>), 2.51 (t,  $J$  = 4.1 Hz, 12H, NCH<sub>2</sub>CH<sub>2</sub>O), 3.21-3.27 (m, 1H, (CH<sub>3</sub>)<sub>2</sub>CH), 3.31-3.37 (m, 1H, (CH<sub>3</sub>)<sub>2</sub>CH), 3.50 (t,  $J$  = 4.2 Hz, 12H, NCH<sub>2</sub>CH<sub>2</sub>O), 3.54 (s, 12H, OCH<sub>2</sub>CH<sub>2</sub>O), 4.55 (s, 1H, NH), 6.21-6.25 (m, 1H, Ar), 6.44-6.50 (m, 3H, Ar), 6.66-6.75 (m, 4H, Ar), 6.92-6.95 (m, 3H, Ar), 6.98-7.02 (m, 2H, Ar), 7.13-7.18 (m, 6H, Ar).  $^{13}\text{C}$  NMR (151 MHz, THF- $d_8$ ) of **3c**:  $\delta$  11.7 (CCH<sub>3</sub>), 12.9 (C<sub>5</sub>Me<sub>5</sub>), 26.9 ((CH<sub>3</sub>)<sub>2</sub>CH), 27.1 ((CH<sub>3</sub>)<sub>2</sub>CH), 27.2 ((CH<sub>3</sub>)<sub>2</sub>CH), 47.5 ((CH<sub>3</sub>)<sub>2</sub>CH), 47.8 ((CH<sub>3</sub>)<sub>2</sub>CH), 54.9 (NCH<sub>2</sub>CH<sub>2</sub>O), 68.6 (NCH<sub>2</sub>CH<sub>2</sub>O), 71.5 (OCH<sub>2</sub>CH<sub>2</sub>O), 95.2 (LuC=C=C), 99.8 (LuNH-C=C), 113.5 (C<sub>5</sub>Me<sub>5</sub>), 114.1 (Ar), 119.1 (Ar), 121.1 (Ar), 125.2 (Ar), 126.4 (Ar), 126.9 (Ar), 127.9 (Ar), 128.0 (Ar), 129.4 (Ar), 130.4 (LuC), 130.5 (Ar), 130.7 (Ar), 131.3 (Ar), 144.8 (Ar), 145.9 (Ar), 147.2 (Ar), 151.6 (Ar), 155.7 (LuNH-C), 161.9 (LuC=C), 171.2 (NCN). Anal. Calcd for C<sub>69</sub>H<sub>96</sub>BrKLuN<sub>5</sub>O<sub>7</sub> of **3c**·THF: C, 59.13; H, 6.90; N, 5.00; Found: C, 58.60; H, 6.85; N, 4.97.

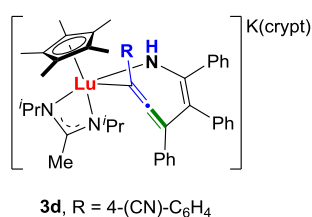

**Synthesis of 3d:** This complex was prepared by an analogous procedure as the synthesis of **3a**, except that phenylacetylene (5.5  $\mu\text{L}$ , 0.050 mmol) was replaced by 4-ethynylbenzonitrile (6.4 mg, 0.050 mmol). **3d**, brown solid. Yield: 80% (51.0 mg, 0.040 mmol). The suitable crystals for X-ray diffraction of **3d** could be obtained through

gradually diffusing hexane into its THF solution at room temperature.  $^1\text{H}$  NMR (400 MHz, THF- $d_8$ ) of **3d**:  $\delta$  0.83 (s, 3H, CCH<sub>3</sub>), 0.94-0.97 (m, 6H, (CH<sub>3</sub>)<sub>2</sub>CH), 1.37 (d,  $J$  = 6.4 Hz, 3H, (CH<sub>3</sub>)<sub>2</sub>CH), 1.46 (d,  $J$  = 6.4 Hz, 3H, (CH<sub>3</sub>)<sub>2</sub>CH), 1.88 (s, 15H, C<sub>5</sub>Me<sub>5</sub>), 2.52 (t,  $J$  = 4.7 Hz, 12H, NCH<sub>2</sub>CH<sub>2</sub>O), 3.19-3.25 (m, 1H, (CH<sub>3</sub>)<sub>2</sub>CH), 3.31-3.38 (m, 1H, (CH<sub>3</sub>)<sub>2</sub>CH), 3.51 (t,  $J$  = 4.7 Hz, 12H, NCH<sub>2</sub>CH<sub>2</sub>O), 3.55 (s, 12H, OCH<sub>2</sub>CH<sub>2</sub>O), 4.62 (s, 1H, NH), 6.23-6.27 (m, 1H, Ar), 6.44-6.53 (m, 3H, Ar), 6.64-6.66 (m, 2H, Ar), 6.73-6.77 (m, 2H, Ar), 6.93-7.03 (m, 5H, Ar), 7.16-7.18 (m, 4H, Ar), 7.26-7.28 (m, 2H, Ar).  $^{13}\text{C}$  NMR (151 MHz, THF- $d_8$ ) of **3d**:  $\delta$  11.8 (CCH<sub>3</sub>), 12.8 (C<sub>5</sub>Me<sub>5</sub>), 26.9 ((CH<sub>3</sub>)<sub>2</sub>CH), 27.1 ((CH<sub>3</sub>)<sub>2</sub>CH), 27.3 ((CH<sub>3</sub>)<sub>2</sub>CH), 47.5 ((CH<sub>3</sub>)<sub>2</sub>CH), 47.9 ((CH<sub>3</sub>)<sub>2</sub>CH), 54.9 (NCH<sub>2</sub>CH<sub>2</sub>O), 68.6 (NCH<sub>2</sub>CH<sub>2</sub>O), 71.5 (OCH<sub>2</sub>CH<sub>2</sub>O), 95.3 (LuC=C=C), 100.0 (LuNH-C=C), 103.1 (ArCN), 113.7 (C<sub>5</sub>Me<sub>5</sub>), 119.4 (Ar), 121.3 (Ar), 121.5 (Ar), 125.3 (Ar), 126.5 (Ar), 126.7 (Ar), 127.0 (Ar), 128.0 (Ar), 128.2 (Ar), 130.4 (Ar), 130.6 (LuC), 131.4 (Ar), 131.6 (Ar), 145.3 (Ar), 147.0 (Ar), 150.9 (Ar), 151.4 (Ar), 155.7 (LuNH-C), 158.8 (LuC=C), 171.3 (NCN).

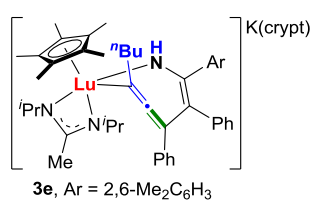

**Synthesis of 3e:** This complex was prepared by an analogous procedure as the synthesis of **3a**, except that PhCN (5.1  $\mu$ L, 0.050 mmol) and phenylacetylene (5.5  $\mu$ L, 0.050 mmol) were replaced by 2,6-Me<sub>2</sub>C<sub>6</sub>H<sub>3</sub>CN (6.6 mg, 0.050 mmol) and 1-hexyne (5.7  $\mu$ L, 0.050 mmol), respectively. **3e**, green solid. Yield: 77% (48.4 mg, 0.039 mmol). <sup>1</sup>H NMR (400 MHz, THF-*d*<sub>8</sub>) of **3e**:  $\delta$  0.87-0.92 (m, 6H, CH<sub>3</sub>(CH<sub>2</sub>)<sub>3</sub> and (CH<sub>3</sub>)<sub>2</sub>CH), 0.96-0.99 (m, 6H, (CH<sub>3</sub>)<sub>2</sub>CH and CCH<sub>3</sub>), 1.03 (d, *J* = 6.4 Hz, 3H, (CH<sub>3</sub>)<sub>2</sub>CH), 1.35 (d, *J* = 6.4 Hz, 3H, (CH<sub>3</sub>)<sub>2</sub>CH), 1.47-1.62 (m, 4H, CH<sub>3</sub>CH<sub>2</sub>CH<sub>2</sub>CH<sub>2</sub> and CH<sub>3</sub>CH<sub>2</sub>CH<sub>2</sub>CH<sub>2</sub>), 1.72 (s, 3H, CH<sub>3</sub> in 2,6-Me<sub>2</sub>C<sub>6</sub>H<sub>3</sub>, overlaps with THF-*d*<sub>8</sub>), 1.95 (s, 15H, C<sub>5</sub>Me<sub>5</sub>), 2.33-2.46 (m, 2H, CH<sub>3</sub>(CH<sub>2</sub>)<sub>2</sub>CH<sub>2</sub>), 2.51-2.54 (m, 12H, NCH<sub>2</sub>CH<sub>2</sub>O), 2.58 (s, 3H, CH<sub>3</sub> in 2,6-Me<sub>2</sub>C<sub>6</sub>H<sub>3</sub>), 3.06-3.12 (m, 1H, (CH<sub>3</sub>)<sub>2</sub>CH), 3.49-3.52 (m, 13H, NCH<sub>2</sub>CH<sub>2</sub>O and (CH<sub>3</sub>)<sub>2</sub>CH), 3.54 (s, 12H, OCH<sub>2</sub>CH<sub>2</sub>O), 3.86 (s, 1H, NH), 6.15-6.18 (m, 1H, Ar), 6.36-6.40 (m, 1H, Ar), 6.43-6.46 (m, 2H, Ar), 6.54-6.56 (m, 1H, Ar), 6.69-6.78 (m, 5H, Ar), 6.85-6.87 (m, 1H, Ar), 7.16 (br, 2H, Ar). <sup>13</sup>C NMR (151 MHz, THF-*d*<sub>8</sub>) of **3e**:  $\delta$  11.9 (CCH<sub>3</sub>), 12.9 (C<sub>5</sub>Me<sub>5</sub>), 14.9 (CH<sub>3</sub>(CH<sub>2</sub>)<sub>3</sub>), 19.8 (CH<sub>3</sub> in 2,6-Me<sub>2</sub>C<sub>6</sub>H<sub>3</sub>), 21.7 (CH<sub>3</sub> in 2,6-Me<sub>2</sub>C<sub>6</sub>H<sub>3</sub>), 23.5 (CH<sub>3</sub>CH<sub>2</sub>(CH<sub>2</sub>)<sub>2</sub>), 26.3 ((CH<sub>3</sub>)<sub>2</sub>CH), 26.9 ((CH<sub>3</sub>)<sub>2</sub>CH), 27.3 ((CH<sub>3</sub>)<sub>2</sub>CH), 27.4 ((CH<sub>3</sub>)<sub>2</sub>CH), 31.0 (CH<sub>3</sub>CH<sub>2</sub>CH<sub>2</sub>CH<sub>2</sub>), 37.3 (CH<sub>3</sub>(CH<sub>2</sub>)<sub>2</sub>CH<sub>2</sub>), 47.7 ((CH<sub>3</sub>)<sub>2</sub>CH), 47.7 ((CH<sub>3</sub>)<sub>2</sub>CH), 54.9 (NCH<sub>2</sub>CH<sub>2</sub>O), 68.6 (NCH<sub>2</sub>CH<sub>2</sub>O), 71.5 (OCH<sub>2</sub>CH<sub>2</sub>O), 91.7 (LuC=C=C), 101.2 (LuNH-C=C), 112.9 (C<sub>5</sub>Me<sub>5</sub>), 118.3 (Ar), 119.3 (Ar), 125.2 (Ar), 126.5 (Ar), 126.8 (Ar), 127.0 (LuC), 127.0 (Ar), 127.6 (Ar), 127.7 (Ar), 136.7 (Ar), 137.0 (Ar), 147.0 (Ar), 147.7 (Ar), 149.8 (Ar), 156.0 (LuNH-C), 161.2 (LuC=C), 171.0 (NCN). Anal. Calcd for C<sub>65</sub>H<sub>97</sub>KLuN<sub>5</sub>O<sub>6</sub> of **3e**: C, 62.03; H, 7.77; N, 5.56; Found: C, 61.82; H, 7.74; N, 5.52.

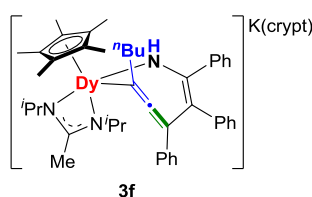

**Synthesis of 3f:** This complex was prepared by an analogous procedure as the synthesis of **3a**, except that **1a** (52.3 mg, 0.050 mmol) and phenylacetylene (5.5  $\mu$ L, 0.050 mmol) were replaced by **1b** (51.6 mg, 0.050 mmol) and 1-hexyne (5.7  $\mu$ L, 0.050 mmol), respectively. **3f**, orange solid. Yield: 85% (51.7 mg, 0.043 mmol). The suitable crystals for X-ray diffraction of **3f** could be obtained through gradually diffusing hexane into its THF solution at room temperature. Anal. Calcd for C<sub>63</sub>H<sub>93</sub>DyKN<sub>5</sub>O<sub>6</sub> of **3f**: C, 62.12; H, 7.70; N, 5.75; Found: C, 61.89; H, 7.93; N, 5.64.

## 2) Copies of $^1\text{H}$ NMR and $^{13}\text{C}$ NMR Spectra

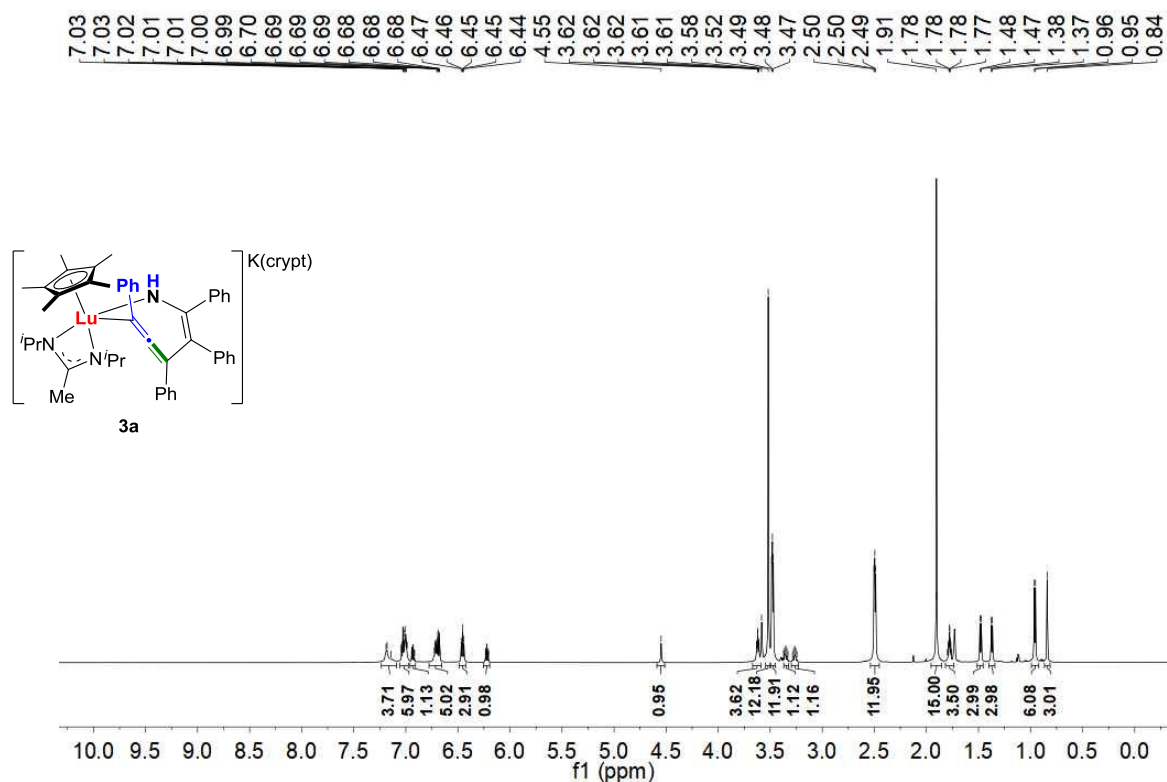

**Figure S1.**  $^1\text{H}$  NMR spectrum of **3a**·THF (25 °C, 600 MHz, THF- $d_8$ ).

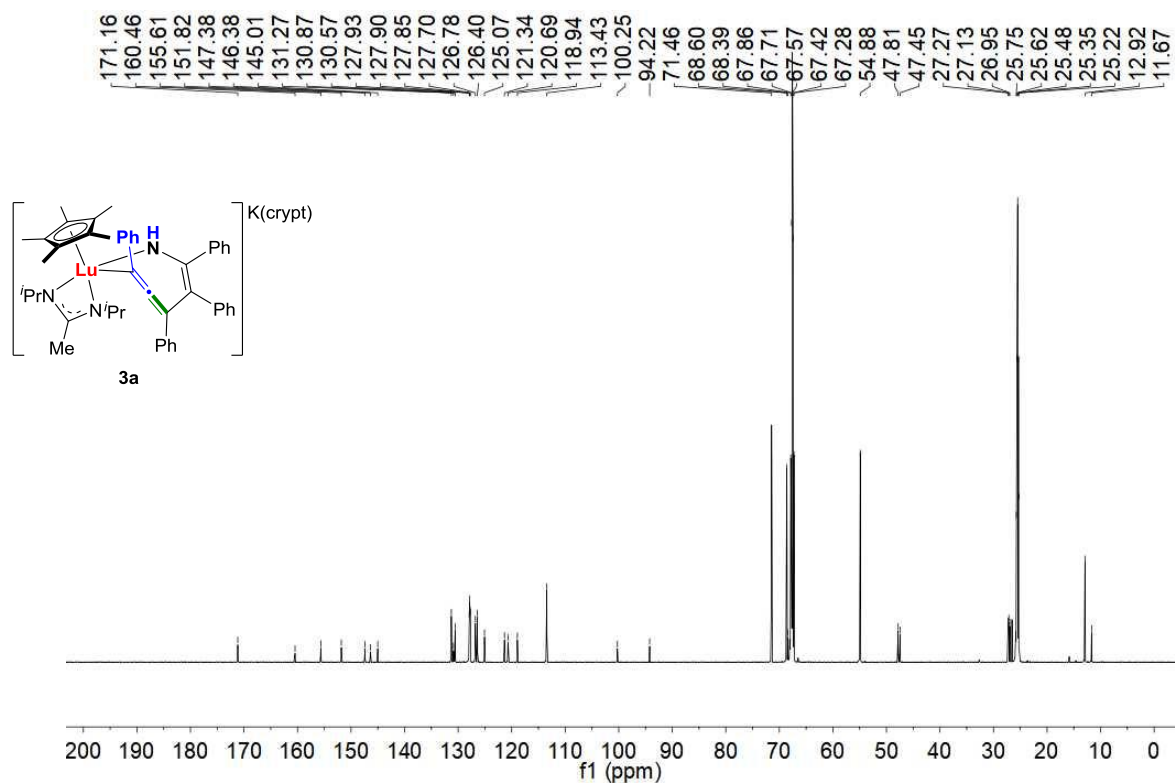

**Figure S2.**  $^{13}\text{C}$  NMR spectrum of **3a**·THF (25 °C, 151 MHz, THF- $d_8$ ).

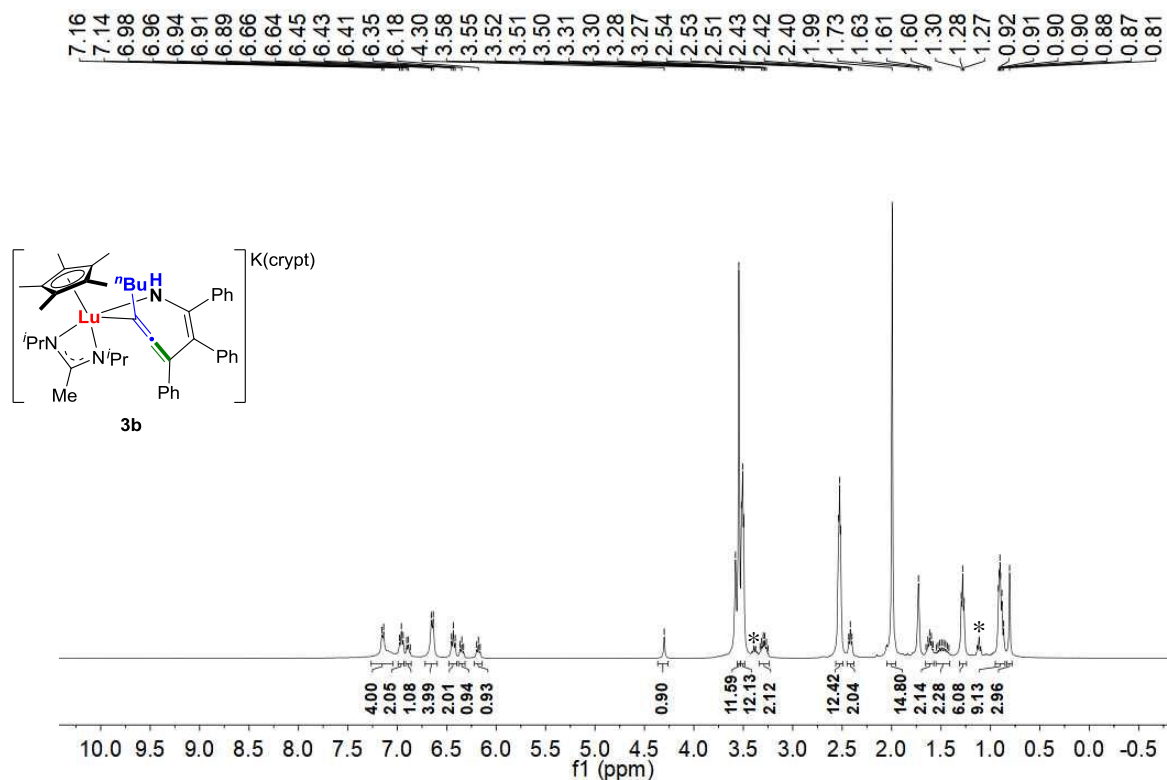

**Figure S3.**  $^1\text{H}$  NMR spectrum of **3b** (25 °C, 400 MHz,  $\text{THF-}d_8$ , “\*”) represents the residual  $\text{Et}_2\text{O}$ ).

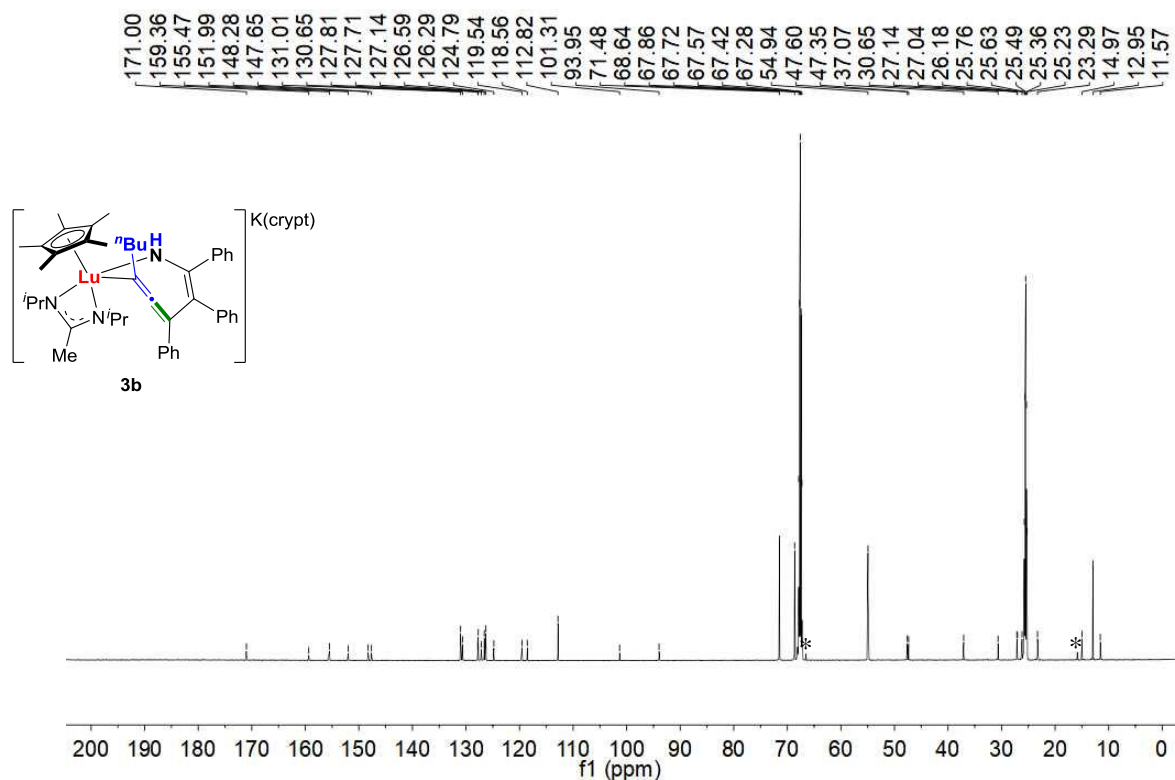

**Figure S4.**  $^{13}\text{C}$  NMR spectrum of **3b** (25 °C, 151 MHz,  $\text{THF-}d_8$ , “\*”) represents the residual  $\text{Et}_2\text{O}$ ).

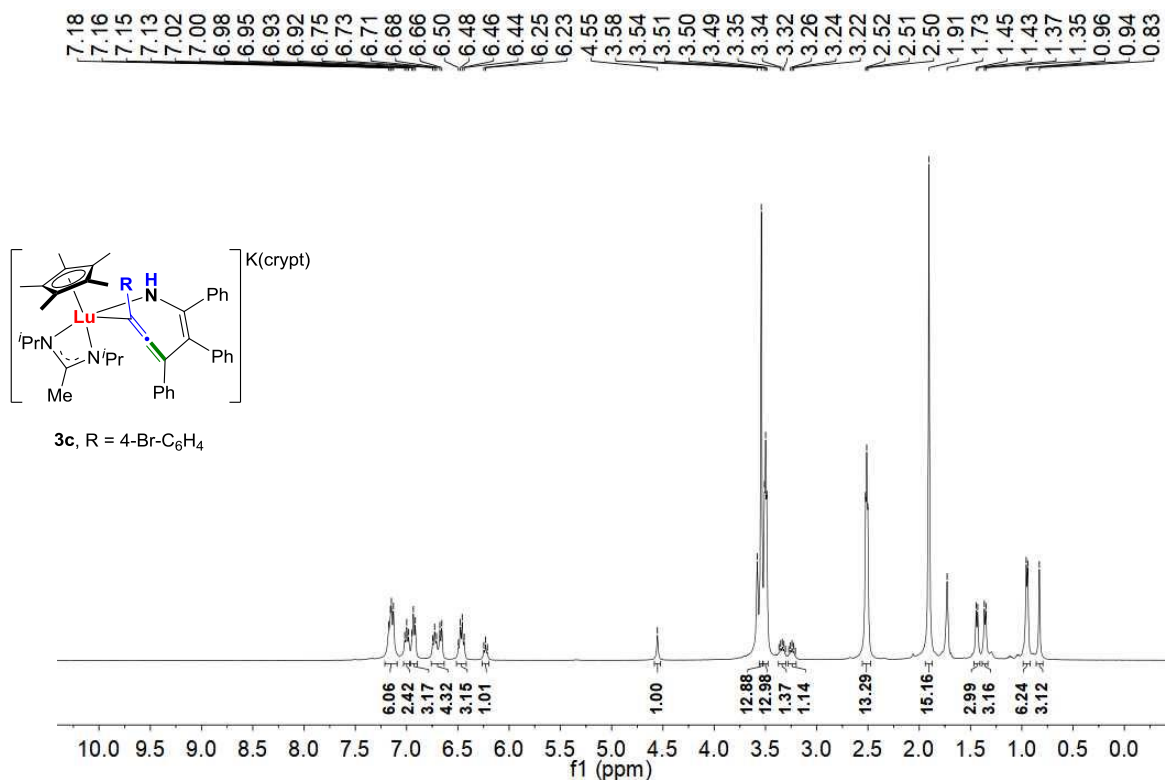

**Figure S5.** <sup>1</sup>H NMR spectrum of **3c** (25 °C, 400 MHz, THF-*d*<sub>8</sub>).

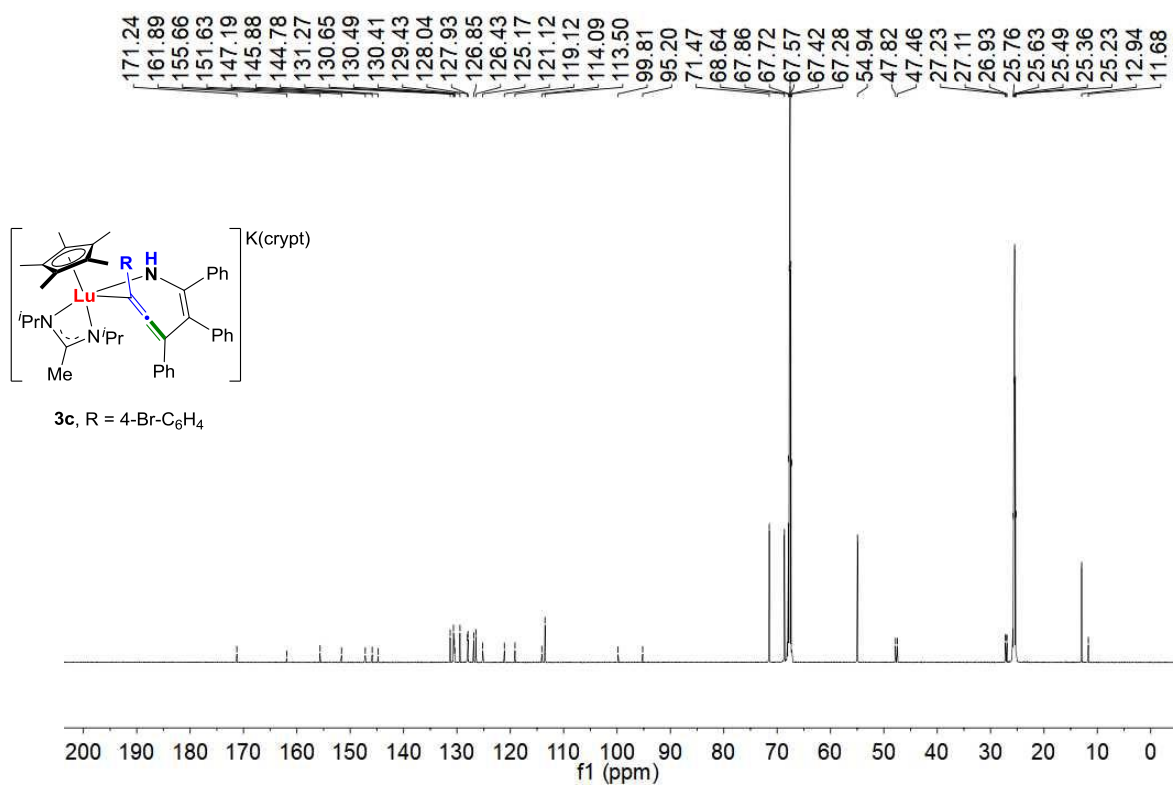

**Figure S6.** <sup>13</sup>C NMR spectrum of **3c** (25 °C, 151 MHz, THF-*d*<sub>8</sub>).



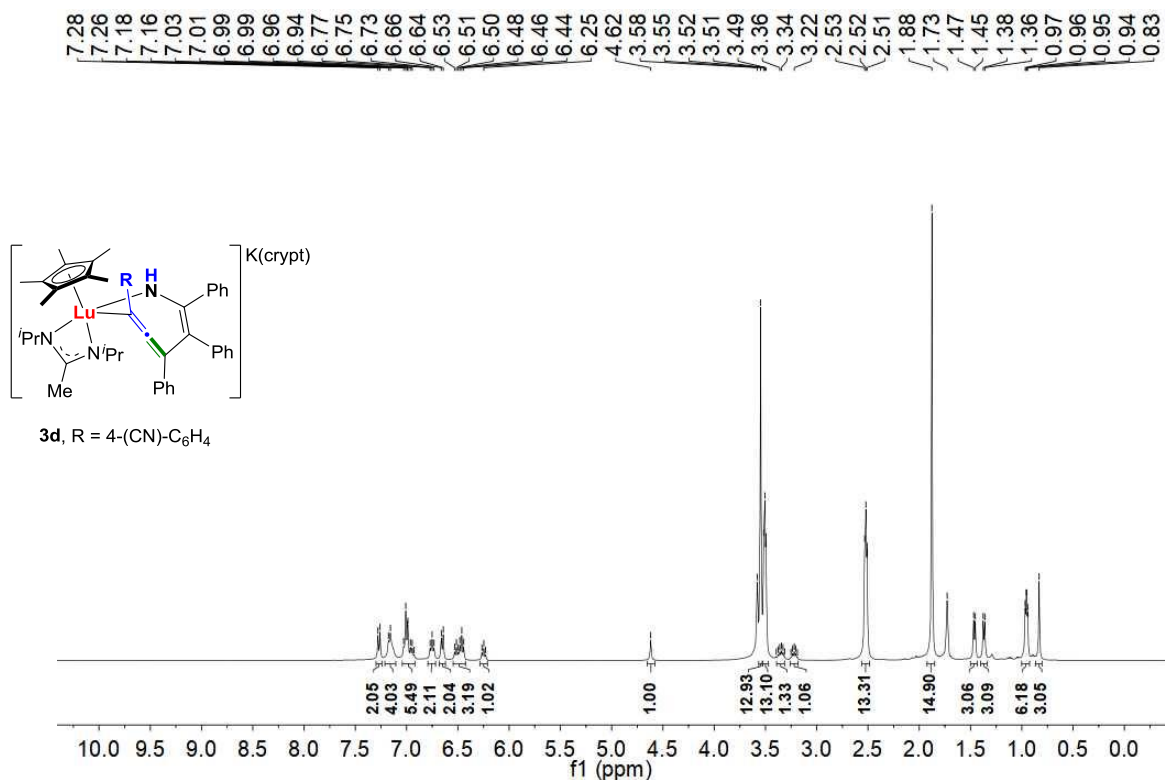

**Figure S7.** <sup>1</sup>H NMR spectrum of **3d** (25 °C, 400 MHz, THF-*d*<sub>8</sub>).

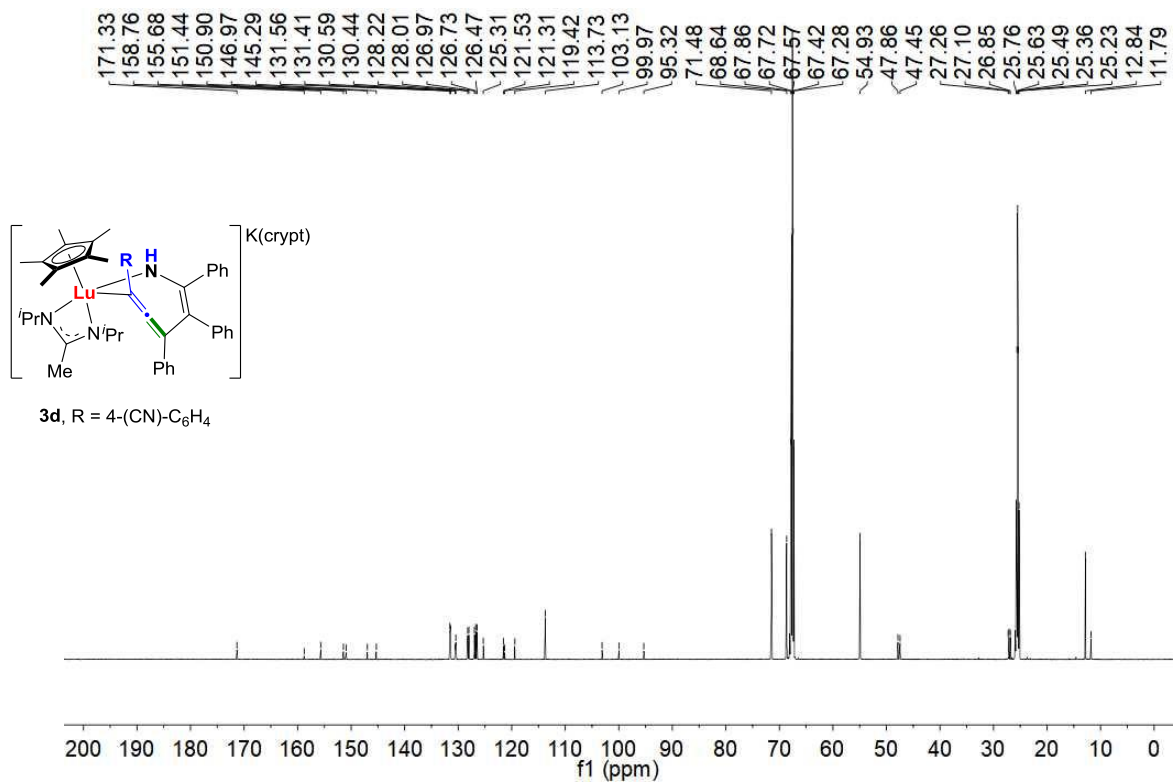

**Figure S8.** <sup>13</sup>C NMR spectrum of **3d** (25 °C, 151 MHz, THF-*d*<sub>8</sub>).

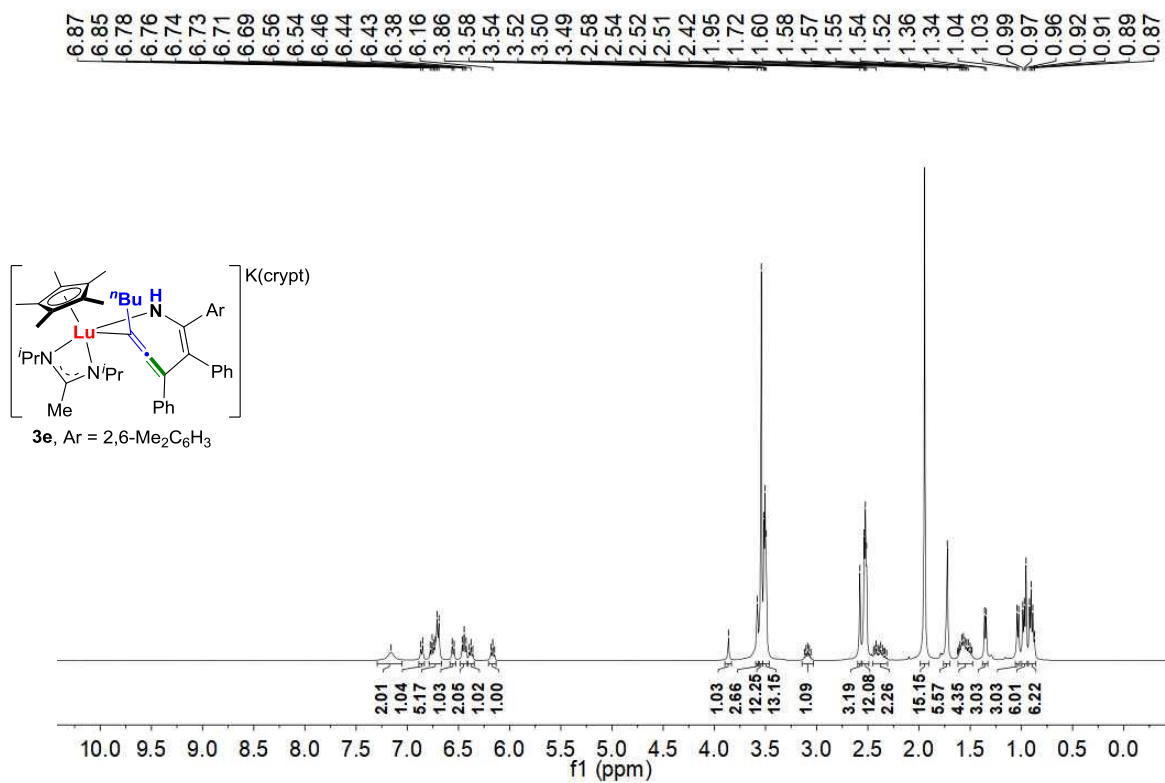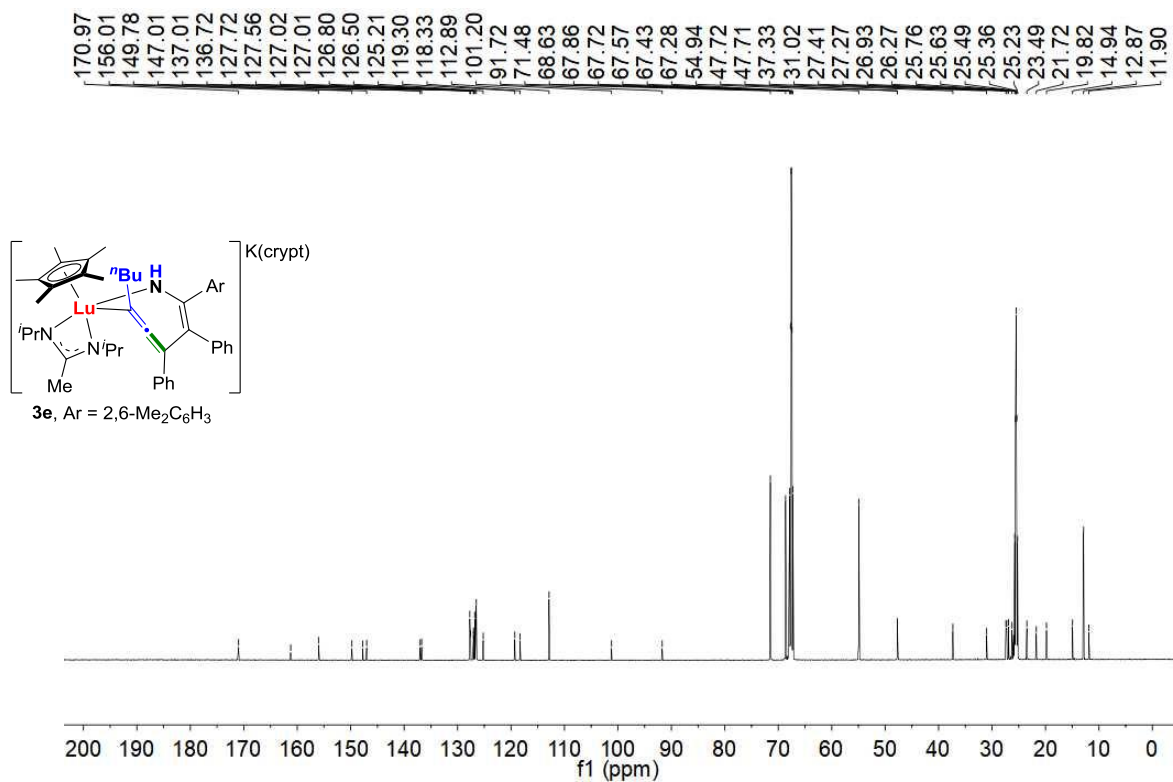

### 3) X-ray Crystallographic Studies

The single crystals of **3a**·THF, **3b**, **3c**·THF, **3d** and **3f** suitable for X-ray analysis were obtained as described in the experimental details. Data collections were performed on a XtaLAB PRO 007HF(Mo): Kappa single diffractometer at 180 K. Using Olex2,<sup>[2]</sup> the structures were solved with Superflip<sup>[3]</sup> structure solution program using Charge Flipping or ShelXS-97<sup>[4]</sup> structure solution program using Direct Methods and refined with the ShelXL<sup>[5]</sup> refinement package using Least Squares minimization. Refinement was performed on  $F^2$  anisotropically for all the non-hydrogen atoms by the full-matrix least-squares method. The hydrogen atoms were placed at the calculated positions and were included in the structure calculation without further refinement of the parameters. Crystallographic data have been deposited with the Cambridge Crystallographic Data Centre with supplementary publication numbers: CCDC 2288512 (**3a**·THF), CCDC 2288515 (**3b**), CCDC 2288513 (**3c**·THF), CCDC 2288514 (**3d**), CCDC 2288516 (**3f**).

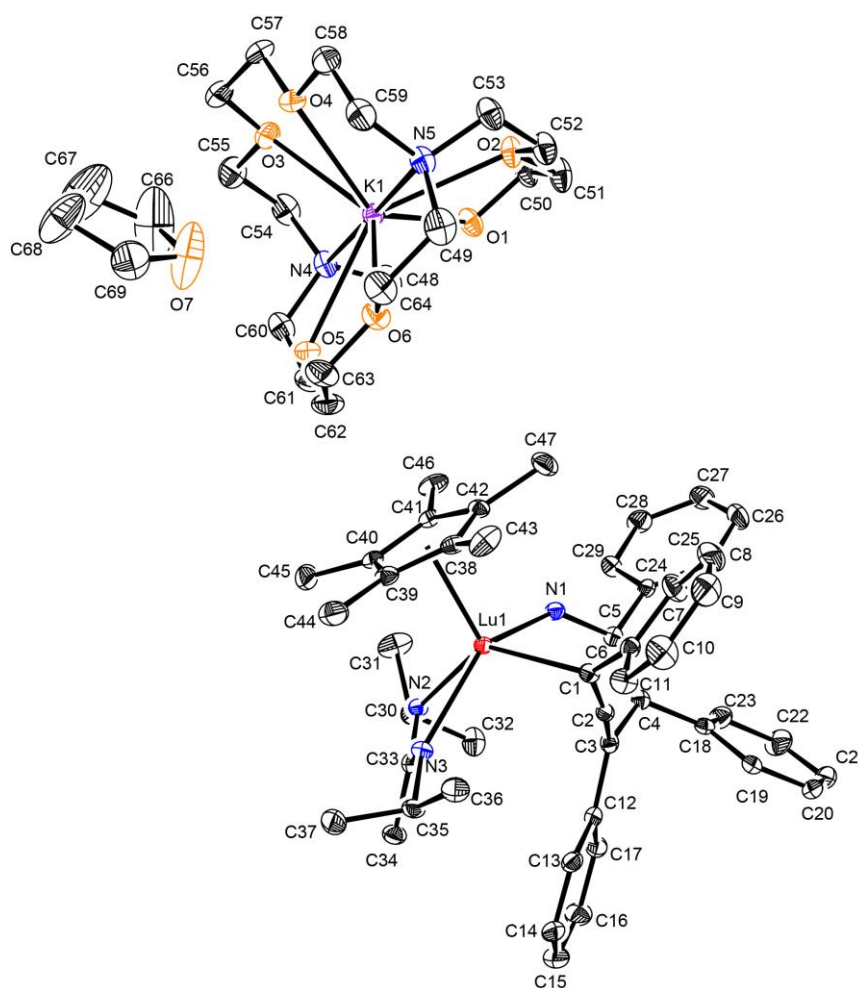

**Figure S11.** ORTEP drawing of **3a**·THF with 30% thermal ellipsoids. H atoms are omitted for clarity.

**Table 1 Crystal data and structure refinement for 3a·THF.**

|                                             |                                                                  |
|---------------------------------------------|------------------------------------------------------------------|
| Identification code                         | <b>3a·THF</b>                                                    |
| Empirical formula                           | C <sub>69</sub> H <sub>97</sub> KLuN <sub>5</sub> O <sub>7</sub> |
| Formula weight                              | 1322.58                                                          |
| Temperature/K                               | 180.00(10)                                                       |
| Crystal system                              | orthorhombic                                                     |
| Space group                                 | P2 <sub>1</sub> 2 <sub>1</sub> 2 <sub>1</sub>                    |
| a/Å                                         | 10.14485(19)                                                     |
| b/Å                                         | 24.5981(7)                                                       |
| c/Å                                         | 27.0702(6)                                                       |
| α/°                                         | 90                                                               |
| β/°                                         | 90                                                               |
| γ/°                                         | 90                                                               |
| Volume/Å <sup>3</sup>                       | 6755.2(3)                                                        |
| Z                                           | 4                                                                |
| ρ <sub>calc</sub> /g/cm <sup>3</sup>        | 1.300                                                            |
| μ/mm <sup>-1</sup>                          | 1.577                                                            |
| F(000)                                      | 2768.0                                                           |
| Crystal size/mm <sup>3</sup>                | 0.15 × 0.13 × 0.12                                               |
| Radiation                                   | Mo Kα (λ = 0.71073)                                              |
| 2θ range for data collection/°              | 4.288 to 52.044                                                  |
| Index ranges                                | -11 ≤ h ≤ 12, -30 ≤ k ≤ 28, -33 ≤ l ≤ 30                         |
| Reflections collected                       | 61247                                                            |
| Independent reflections                     | 13286 [R <sub>int</sub> = 0.0510, R <sub>sigma</sub> = 0.0474]   |
| Data/restraints/parameters                  | 13286/1/762                                                      |
| Goodness-of-fit on F <sup>2</sup>           | 0.981                                                            |
| Final R indexes [I ≥ 2σ (I)]                | R <sub>1</sub> = 0.0251, wR <sub>2</sub> = 0.0502                |
| Final R indexes [all data]                  | R <sub>1</sub> = 0.0311, wR <sub>2</sub> = 0.0516                |
| Largest diff. peak/hole / e Å <sup>-3</sup> | 0.35/-0.44                                                       |
| Flack parameter                             | -0.015(3)                                                        |

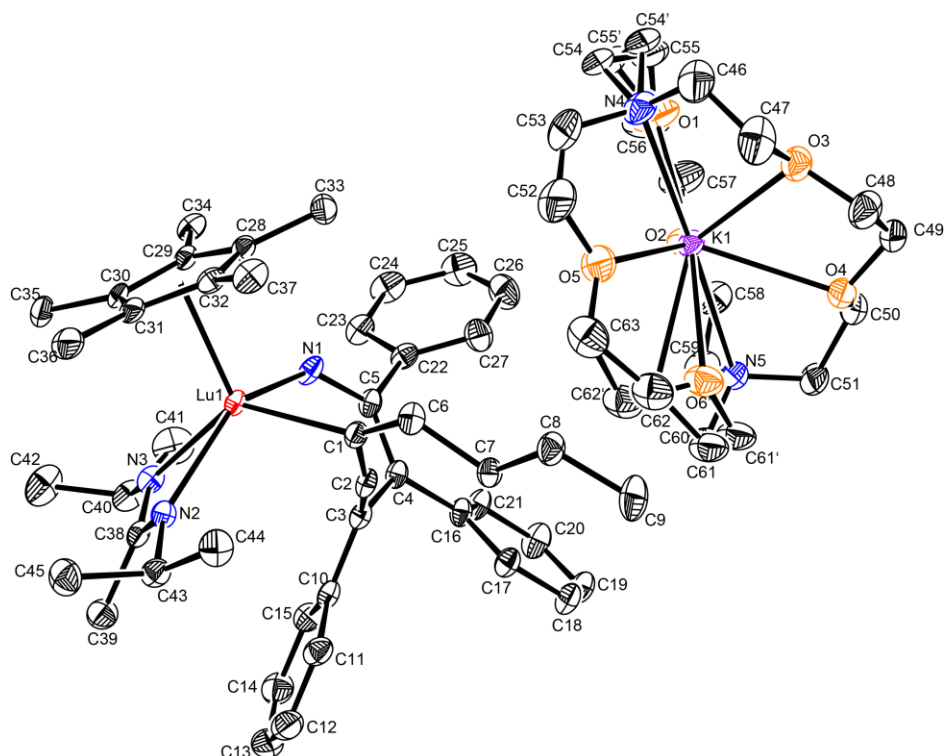

**Figure S12.** ORTEP drawing of **3b** with 30% thermal ellipsoids. H atoms are omitted for clarity.

**Table 2 Crystal data and structure refinement for 3b.**

|                                               |                                                                |
|-----------------------------------------------|----------------------------------------------------------------|
| Identification code                           | <b>3b</b>                                                      |
| Empirical formula                             | $C_{63}H_{93}KLuN_5O_6$                                        |
| Formula weight                                | 1230.49                                                        |
| Temperature/K                                 | 180.00(10)                                                     |
| Crystal system                                | monoclinic                                                     |
| Space group                                   | $P2_1/n$                                                       |
| $a/\text{\AA}$                                | 10.2216(4)                                                     |
| $b/\text{\AA}$                                | 35.5765(11)                                                    |
| $c/\text{\AA}$                                | 17.2539(5)                                                     |
| $\alpha/^\circ$                               | 90                                                             |
| $\beta/^\circ$                                | 100.557(3)                                                     |
| $\gamma/^\circ$                               | 90                                                             |
| Volume/ $\text{\AA}^3$                        | 6168.2(4)                                                      |
| Z                                             | 4                                                              |
| $\rho_{\text{calc}}/\text{g/cm}^3$            | 1.325                                                          |
| $\mu/\text{mm}^{-1}$                          | 1.720                                                          |
| F(000)                                        | 2576.0                                                         |
| Crystal size/ $\text{mm}^3$                   | $0.1 \times 0.1 \times 0.1$                                    |
| Radiation                                     | MoK $\alpha$ ( $\lambda = 0.71073$ )                           |
| $2\theta$ range for data collection/ $^\circ$ | 4.316 to 54.968                                                |
| Index ranges                                  | $-13 \leq h \leq 12, -44 \leq k \leq 46, -18 \leq l \leq 22$   |
| Reflections collected                         | 48971                                                          |
| Independent reflections                       | 14109 [ $R_{\text{int}} = 0.0586, R_{\text{sigma}} = 0.0612$ ] |
| Data/restraints/parameters                    | 14109/184/743                                                  |

|                                                |                                  |
|------------------------------------------------|----------------------------------|
| Goodness-of-fit on $F^2$                       | 1.054                            |
| Final R indexes [ $I \geq 2\sigma(I)$ ]        | $R_1 = 0.0355$ , $wR_2 = 0.0762$ |
| Final R indexes [all data]                     | $R_1 = 0.0484$ , $wR_2 = 0.0802$ |
| Largest diff. peak/hole / $e \text{ \AA}^{-3}$ | 1.25/-0.76                       |

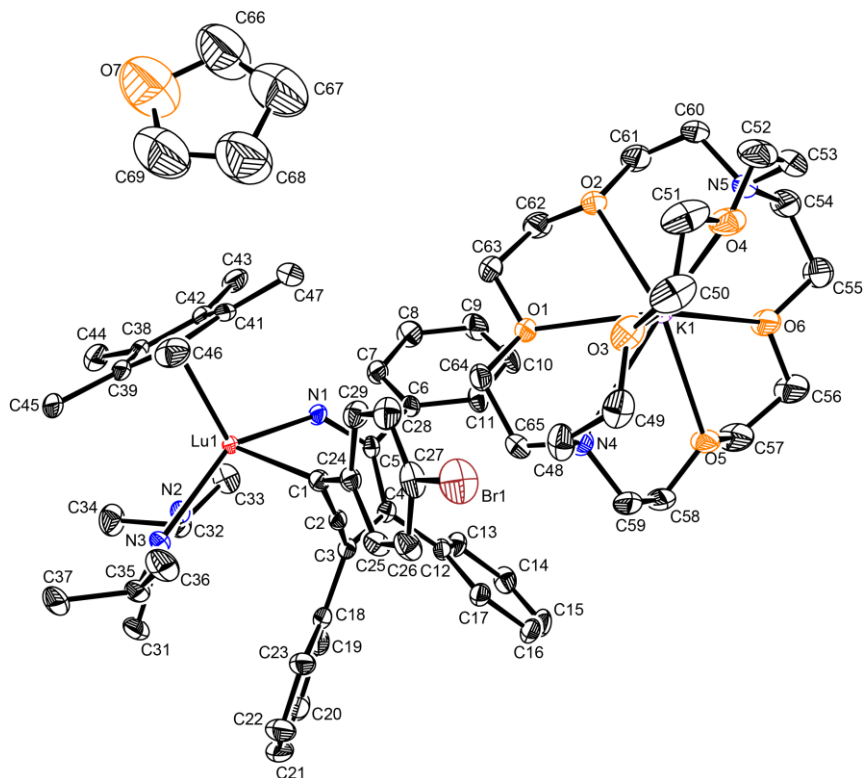

**Figure S13.** ORTEP drawing of **3c·THF** with 30% thermal ellipsoids. H atoms are omitted for clarity.

**Table 3 Crystal data and structure refinement for 3c·THF.**

|                                  |                           |
|----------------------------------|---------------------------|
| Identification code              | <b>3c·THF</b>             |
| Empirical formula                | $C_{69}H_{96}BrKLuN_5O_7$ |
| Formula weight                   | 1401.48                   |
| Temperature/K                    | 180.00(10)                |
| Crystal system                   | triclinic                 |
| Space group                      | P1                        |
| $a/\text{\AA}$                   | 10.3921(2)                |
| $b/\text{\AA}$                   | 13.6701(3)                |
| $c/\text{\AA}$                   | 13.8088(3)                |
| $\alpha/^\circ$                  | 78.741(2)                 |
| $\beta/^\circ$                   | 72.513(2)                 |
| $\gamma/^\circ$                  | 69.266(2)                 |
| Volume/ $\text{\AA}^3$           | 1741.15(7)                |
| Z                                | 1                         |
| $\rho_{\text{calc}}/\text{cm}^3$ | 1.337                     |
| $\mu/\text{mm}^{-1}$             | 2.104                     |

|                                                  |                                                                        |
|--------------------------------------------------|------------------------------------------------------------------------|
| F(000)                                           | 726.0                                                                  |
| Crystal size/mm <sup>3</sup>                     | 0.1 × 0.1 × 0.1                                                        |
| Radiation                                        | MoK $\alpha$ ( $\lambda$ = 0.71073)                                    |
| 2 $\Theta$ range for data collection/ $^{\circ}$ | 4.65 to 54.97                                                          |
| Index ranges                                     | -13 $\leq$ h $\leq$ 13, -17 $\leq$ k $\leq$ 17, -17 $\leq$ l $\leq$ 17 |
| Reflections collected                            | 36970                                                                  |
| Independent reflections                          | 14745 [ $R_{\text{int}}$ = 0.0228, $R_{\text{sigma}}$ = 0.0275]        |
| Data/restraints/parameters                       | 14745/73/768                                                           |
| Goodness-of-fit on $F^2$                         | 1.037                                                                  |
| Final R indexes [ $I \geq 2\sigma(I)$ ]          | $R_1$ = 0.0205, $wR_2$ = 0.0504                                        |
| Final R indexes [all data]                       | $R_1$ = 0.0205, $wR_2$ = 0.0505                                        |
| Largest diff. peak/hole / e $\text{\AA}^{-3}$    | 0.75/-0.56                                                             |
| Flack parameter                                  | 0.746(5)                                                               |

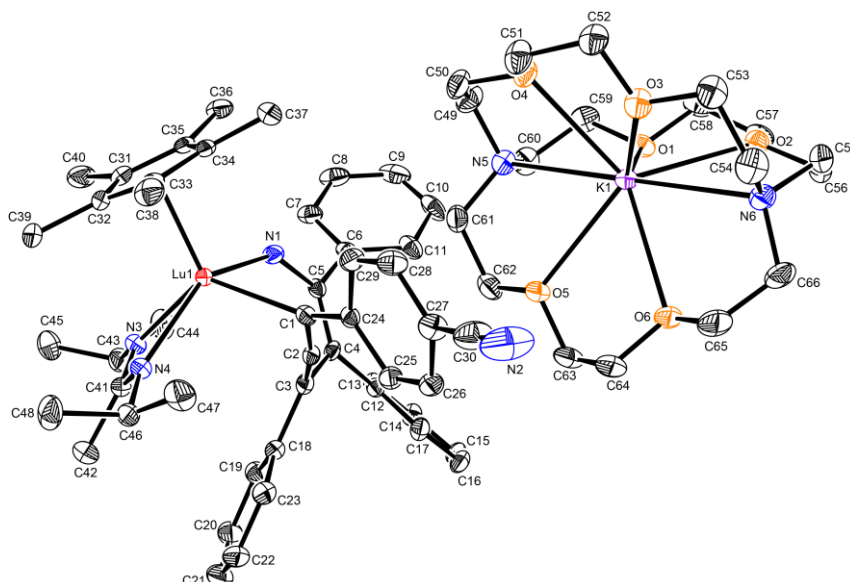

**Figure S14.** ORTEP drawing of **3d** with 30% thermal ellipsoids. H atoms are omitted for clarity.

**Table 4 Crystal data and structure refinement for 3f.**

|                        |                         |
|------------------------|-------------------------|
| Identification code    | <b>3f</b>               |
| Empirical formula      | $C_{66}H_{88}KLuN_6O_6$ |
| Formula weight         | 1275.49                 |
| Temperature/K          | 179.99(10)              |
| Crystal system         | orthorhombic            |
| Space group            | $P2_12_12_1$            |
| a/ $\text{\AA}$        | 10.4772(4)              |
| b/ $\text{\AA}$        | 24.6064(10)             |
| c/ $\text{\AA}$        | 24.7943(9)              |
| $\alpha/^\circ$        | 90                      |
| $\beta/^\circ$         | 90                      |
| $\gamma/^\circ$        | 90                      |
| Volume/ $\text{\AA}^3$ | 6392.1(4)               |

|                                                |                                                                |
|------------------------------------------------|----------------------------------------------------------------|
| Z                                              | 4                                                              |
| $\rho_{\text{calc}}/\text{cm}^3$               | 1.325                                                          |
| $\mu/\text{mm}^{-1}$                           | 1.663                                                          |
| F(000)                                         | 2656.0                                                         |
| Crystal size/ $\text{mm}^3$                    | $0.1 \times 0.1 \times 0.1$                                    |
| Radiation                                      | MoK $\alpha$ ( $\lambda = 0.71073$ )                           |
| $2\theta$ range for data collection/ $^\circ$  | 5.09 to 54.968                                                 |
| Index ranges                                   | $-13 \leq h \leq 12, -31 \leq k \leq 31, -32 \leq l \leq 27$   |
| Reflections collected                          | 47964                                                          |
| Independent reflections                        | 14451 [ $R_{\text{int}} = 0.0449, R_{\text{sigma}} = 0.0493$ ] |
| Data/restraints/parameters                     | 14451/30/731                                                   |
| Goodness-of-fit on $F^2$                       | 1.043                                                          |
| Final R indexes [ $I \geq 2\sigma(I)$ ]        | $R_1 = 0.0339, wR_2 = 0.0690$                                  |
| Final R indexes [all data]                     | $R_1 = 0.0390, wR_2 = 0.0703$                                  |
| Largest diff. peak/hole / $e \text{ \AA}^{-3}$ | 1.48/-1.20                                                     |
| Flack parameter                                | -0.008(4)                                                      |

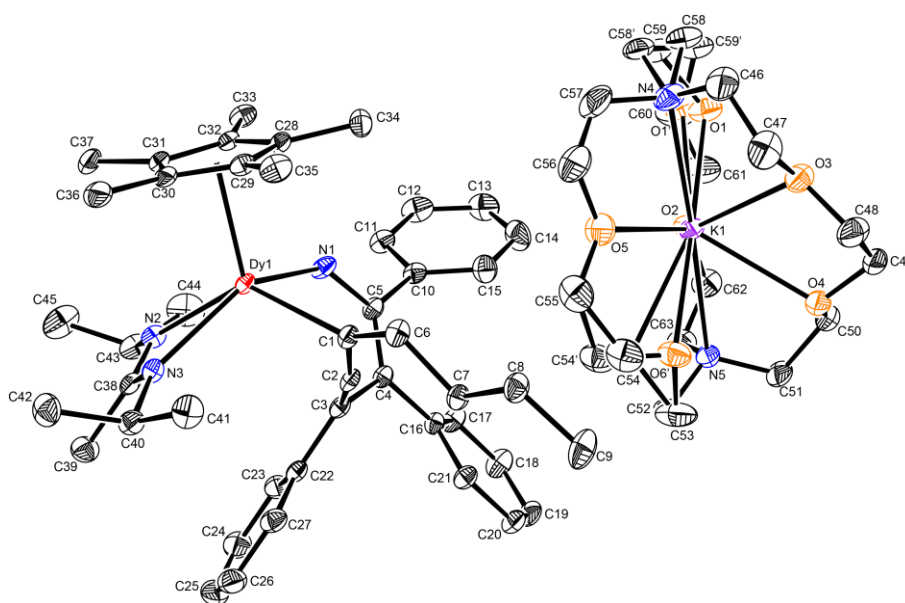

**Figure S15.** ORTEP drawing of **3f** with 30% thermal ellipsoids. H atoms are omitted for clarity.

**Table 5 Crystal data and structure refinement for 3f.**

|                     |                                                     |
|---------------------|-----------------------------------------------------|
| Identification code | <b>3f</b>                                           |
| Empirical formula   | $\text{C}_{63}\text{H}_{93}\text{DyKN}_5\text{O}_6$ |
| Formula weight      | 1218.02                                             |
| Temperature/K       | 179.99(10)                                          |
| Crystal system      | monoclinic                                          |
| Space group         | $P2_1/n$                                            |
| $a/\text{\AA}$      | 10.2598(2)                                          |
| $b/\text{\AA}$      | 35.6923(7)                                          |
| $c/\text{\AA}$      | 17.2714(5)                                          |
| $\alpha/^\circ$     | 90                                                  |



|                                               |                                                                |
|-----------------------------------------------|----------------------------------------------------------------|
| $\beta/^\circ$                                | 100.088(3)                                                     |
| $\gamma/^\circ$                               | 90                                                             |
| Volume/ $\text{\AA}^3$                        | 6226.9(3)                                                      |
| Z                                             | 4                                                              |
| $\rho_{\text{calc}}/\text{g/cm}^3$            | 1.299                                                          |
| $\mu/\text{mm}^{-1}$                          | 1.319                                                          |
| F(000)                                        | 2556.0                                                         |
| Crystal size/ $\text{mm}^3$                   | $0.1 \times 0.1 \times 0.1$                                    |
| Radiation                                     | MoK $\alpha$ ( $\lambda = 0.71073$ )                           |
| $2\Theta$ range for data collection/ $^\circ$ | 4.19 to 54.968                                                 |
| Index ranges                                  | $-13 \leq h \leq 13, -46 \leq k \leq 46, -22 \leq l \leq 22$   |
| Reflections collected                         | 53034                                                          |
| Independent reflections                       | 14237 [ $R_{\text{int}} = 0.0286, R_{\text{sigma}} = 0.0315$ ] |
| Data/restraints/parameters                    | 14237/222/743                                                  |
| Goodness-of-fit on $F^2$                      | 1.036                                                          |
| Final R indexes [ $I \geq 2\sigma(I)$ ]       | $R_1 = 0.0304, wR_2 = 0.0619$                                  |
| Final R indexes [all data]                    | $R_1 = 0.03898, wR_2 = 0.0645$                                 |
| Largest diff. peak/hole / $e \text{\AA}^{-3}$ | 0.56/-0.46                                                     |

#### 4) Details of DFT Calculations

All calculations were carried out with GAUSSIAN 16 program package.<sup>[6]</sup> The structures were optimized at PBE0-D3<sup>[7,8]</sup>/MWB60<sup>[9]</sup> (for Lu)/6-31G(d,p)<sup>[10]</sup> (for other elements) level in gas phase. The effect of solvent was examined by performing single-point self-consistent reaction field (SCRF) calculations based on the solvation model density (SMD)<sup>[11]</sup> for gas-phase optimized structures. THF was used as the solvent, and solvation free energies ( $\Delta G_{\text{sol}}$ ) were calculated by adding the solvation energies to the computed gas phase relative free energies ( $\Delta G_{\text{gas}}$ ). Solvation free energies ( $\Delta G_{\text{sol}}$ ) were calculated at PBE0-D3/MWB28<sup>[9]</sup> (for Lu)/6-311+G(d,p)<sup>[12]</sup> (for other elements) level. Harmonic frequency calculations were performed at the same level for every structure to confirm it as a local minimum and to derive the thermochemical corrections for enthalpies and free energies. The intrinsic reaction coordinate (IRC) analysis was carried out throughout the pathways to confirm that all stationary points are smoothly connected to each other. All enthalpies and the Gibbs free energies in the text were given in Hartree. All distances were given in Å. The PIO analysis was performed by the combination of the program package from Github (<https://github.com/jxzhangcc/PIO>) and the NBO analysis.<sup>[13]</sup>

#### 2a

298 K, 1 atm, gas phase

Thermal correction to Enthalpy = 0.811806

Thermal correction to Gibbs Free Energy = 0.681103

Sum of electronic and thermal Enthalpies = -1716.144980

Sum of electronic and thermal Free Energies = -1716.275684

298 K, in THF

Sum of electronic and thermal Free Energies = -2912.934950

Standard orientation:

| Center<br>Number | Atomic<br>Number | Atomic<br>Type | Coordinates (Angstroms) |           |           |
|------------------|------------------|----------------|-------------------------|-----------|-----------|
|                  |                  |                | X                       | Y         | Z         |
| 1                | 7                | 0              | 2.213748                | -1.866251 | 1.064266  |
| 2                | 7                | 0              | 2.563110                | 0.253360  | 1.722301  |
| 3                | 6                | 0              | -1.980045               | 0.255919  | 0.130747  |
| 4                | 6                | 0              | -1.678849               | -1.218112 | -0.126711 |
| 5                | 6                | 0              | 2.035792                | -3.281960 | 1.307550  |
| 6                | 1                | 0              | 2.890077                | -3.696691 | 1.871500  |
| 7                | 6                | 0              | 0.755120                | -3.531932 | 2.112252  |
| 8                | 1                | 0              | 0.775185                | -2.998163 | 3.069148  |
| 9                | 1                | 0              | 0.615156                | -4.600064 | 2.319337  |
| 10               | 1                | 0              | -0.099925               | -3.168904 | 1.531988  |
| 11               | 6                | 0              | 1.951840                | -4.012936 | -0.028709 |

|    |    |   |           |           |           |
|----|----|---|-----------|-----------|-----------|
| 12 | 1  | 0 | 1.111871  | -3.602586 | -0.600584 |
| 13 | 1  | 0 | 1.786224  | -5.085903 | 0.123591  |
| 14 | 1  | 0 | 2.873378  | -3.880245 | -0.602340 |
| 15 | 6  | 0 | 2.732585  | -1.045753 | 1.970365  |
| 16 | 6  | 0 | 3.469725  | -1.577365 | 3.182209  |
| 17 | 1  | 0 | 4.028268  | -0.798826 | 3.702602  |
| 18 | 1  | 0 | 4.167865  | -2.362886 | 2.879459  |
| 19 | 1  | 0 | 2.764528  | -2.025400 | 3.889583  |
| 20 | 6  | 0 | 3.040448  | 1.277418  | 2.623288  |
| 21 | 1  | 0 | 4.071882  | 1.062545  | 2.958521  |
| 22 | 6  | 0 | 2.157925  | 1.388552  | 3.872050  |
| 23 | 1  | 0 | 1.123228  | 1.583201  | 3.573800  |
| 24 | 1  | 0 | 2.490441  | 2.200087  | 4.530961  |
| 25 | 1  | 0 | 2.161235  | 0.457695  | 4.447602  |
| 26 | 6  | 0 | 3.087019  | 2.612193  | 1.886246  |
| 27 | 1  | 0 | 3.776433  | 2.557249  | 1.041068  |
| 28 | 1  | 0 | 3.415093  | 3.418998  | 2.551605  |
| 29 | 1  | 0 | 2.096551  | 2.872167  | 1.498747  |
| 30 | 6  | 0 | 3.083957  | 0.740103  | -1.827596 |
| 31 | 6  | 0 | 1.925667  | 1.507592  | -2.128062 |
| 32 | 6  | 0 | 0.972891  | 0.633553  | -2.723889 |
| 33 | 6  | 0 | 1.546944  | -0.665384 | -2.800928 |
| 34 | 6  | 0 | 2.849663  | -0.599847 | -2.242974 |
| 35 | 6  | 0 | 4.392736  | 1.232105  | -1.289368 |
| 36 | 1  | 0 | 4.370924  | 2.311688  | -1.114677 |
| 37 | 1  | 0 | 5.209254  | 1.036235  | -1.998486 |
| 38 | 1  | 0 | 4.661995  | 0.747421  | -0.342741 |
| 39 | 6  | 0 | 1.770584  | 2.985122  | -1.921946 |
| 40 | 1  | 0 | 0.730236  | 3.265377  | -1.735463 |
| 41 | 1  | 0 | 2.116228  | 3.555339  | -2.795779 |
| 42 | 1  | 0 | 2.346173  | 3.335137  | -1.058755 |
| 43 | 6  | 0 | -0.387907 | 0.987783  | -3.240260 |
| 44 | 1  | 0 | -1.168361 | 0.375265  | -2.772825 |
| 45 | 1  | 0 | -0.455090 | 0.836008  | -4.326339 |
| 46 | 1  | 0 | -0.627792 | 2.034563  | -3.038390 |
| 47 | 6  | 0 | 0.873626  | -1.856617 | -3.408805 |
| 48 | 1  | 0 | -0.137484 | -1.980282 | -3.007835 |
| 49 | 1  | 0 | 1.416824  | -2.780221 | -3.187754 |
| 50 | 1  | 0 | 0.802932  | -1.765219 | -4.501817 |
| 51 | 6  | 0 | 3.873142  | -1.690515 | -2.166889 |
| 52 | 1  | 0 | 4.213902  | -1.859464 | -1.138501 |
| 53 | 1  | 0 | 4.758520  | -1.447231 | -2.771334 |
| 54 | 1  | 0 | 3.474647  | -2.638687 | -2.537762 |
| 55 | 71 | 0 | 1.161113  | -0.184945 | -0.213878 |
| 56 | 6  | 0 | -0.914017 | 1.090212  | 0.286801  |
| 57 | 7  | 0 | -0.532590 | -1.622283 | -0.499185 |
| 58 | 6  | 0 | -2.758489 | -2.244053 | 0.133735  |
| 59 | 6  | 0 | -2.745072 | -3.426554 | -0.615620 |
| 60 | 6  | 0 | -3.701321 | -2.123335 | 1.160999  |
| 61 | 6  | 0 | -3.657602 | -4.444183 | -0.368042 |

|    |   |   |           |           |           |
|----|---|---|-----------|-----------|-----------|
| 62 | 1 | 0 | -1.977283 | -3.522255 | -1.378851 |
| 63 | 6 | 0 | -4.602376 | -3.151849 | 1.428401  |
| 64 | 1 | 0 | -3.728499 | -1.216858 | 1.757970  |
| 65 | 6 | 0 | -4.592633 | -4.312279 | 0.659564  |
| 66 | 1 | 0 | -3.637514 | -5.348937 | -0.971905 |
| 67 | 1 | 0 | -5.319009 | -3.041638 | 2.239149  |
| 68 | 1 | 0 | -5.304111 | -5.109832 | 0.860778  |
| 69 | 6 | 0 | -3.393669 | 0.719333  | 0.080164  |
| 70 | 6 | 0 | -4.230552 | 0.324511  | -0.974605 |
| 71 | 6 | 0 | -3.931670 | 1.572849  | 1.054607  |
| 72 | 6 | 0 | -5.545131 | 0.770896  | -1.058675 |
| 73 | 1 | 0 | -3.835460 | -0.345537 | -1.733971 |
| 74 | 6 | 0 | -5.247125 | 2.016627  | 0.976064  |
| 75 | 1 | 0 | -3.295714 | 1.891929  | 1.875004  |
| 76 | 6 | 0 | -6.062567 | 1.619107  | -0.081990 |
| 77 | 1 | 0 | -6.170024 | 0.451122  | -1.889330 |
| 78 | 1 | 0 | -5.637588 | 2.679034  | 1.745200  |
| 79 | 1 | 0 | -7.091239 | 1.965560  | -0.143671 |
| 80 | 6 | 0 | -1.089212 | 2.540761  | 0.393037  |
| 81 | 6 | 0 | -0.573457 | 3.259193  | 1.487563  |
| 82 | 6 | 0 | -1.705613 | 3.296973  | -0.626081 |
| 83 | 6 | 0 | -0.663174 | 4.644964  | 1.562859  |
| 84 | 1 | 0 | -0.102401 | 2.702658  | 2.292313  |
| 85 | 6 | 0 | -1.777410 | 4.683440  | -0.561638 |
| 86 | 1 | 0 | -2.138141 | 2.768693  | -1.470416 |
| 87 | 6 | 0 | -1.256615 | 5.372831  | 0.533024  |
| 88 | 1 | 0 | -0.255400 | 5.160641  | 2.429921  |
| 89 | 1 | 0 | -2.254760 | 5.231223  | -1.371522 |
| 90 | 1 | 0 | -1.313108 | 6.457128  | 0.582426  |

### Phenylacetylene

298 K, 1 atm, gas phase

Thermal correction to Enthalpy = 0.117731

Thermal correction to Gibbs Free Energy = 0.079962

Sum of electronic and thermal Enthalpies = -307.912910

Sum of electronic and thermal Free Energies = -307.950678

298 K, in THF

Sum of electronic and thermal Free Energies = -308.024913

Standard orientation:

| Center<br>Number | Atomic<br>Number | Atomic<br>Type | Coordinates (Angstroms) |           |           |
|------------------|------------------|----------------|-------------------------|-----------|-----------|
|                  |                  |                | X                       | Y         | Z         |
| 1                | 6                | 0              | 1.508305                | 1.205620  | 0.000037  |
| 2                | 6                | 0              | 0.119367                | 1.210323  | 0.000003  |
| 3                | 6                | 0              | -0.590523               | -0.000002 | -0.000014 |
| 4                | 6                | 0              | 0.119376                | -1.210326 | 0.000003  |
| 5                | 6                | 0              | 1.508311                | -1.205614 | 0.000037  |

|    |   |   |           |           |           |
|----|---|---|-----------|-----------|-----------|
| 6  | 6 | 0 | 2.206425  | 0.000006  | 0.000054  |
| 7  | 1 | 0 | 2.048817  | 2.147609  | 0.000050  |
| 8  | 1 | 0 | -0.430370 | 2.146084  | -0.000010 |
| 9  | 1 | 0 | -0.430360 | -2.146088 | -0.000010 |
| 10 | 1 | 0 | 2.048832  | -2.147598 | 0.000050  |
| 11 | 1 | 0 | 3.292454  | 0.000007  | 0.000080  |
| 12 | 6 | 0 | -2.017225 | -0.000012 | -0.000048 |
| 13 | 6 | 0 | -3.226758 | -0.000013 | -0.000079 |
| 14 | 1 | 0 | -4.293042 | 0.000095  | -0.000113 |

**TS1**

298 K, 1 atm, gas phase

Thermal correction to Enthalpy = 0.927702

Thermal correction to Gibbs Free Energy = 0.783443

Sum of electronic and thermal Enthalpies = -2024.050884

Sum of electronic and thermal Free Energies = -2024.195143

298 K, in THF

Sum of electronic and thermal Free Energies = -3220.920830

Standard orientation:

| Center Number | Atomic Number | Atomic Type | Coordinates (Angstroms) |           |           |
|---------------|---------------|-------------|-------------------------|-----------|-----------|
|               |               |             | X                       | Y         | Z         |
| 1             | 71            | 0           | -0.564369               | -1.168383 | -0.128162 |
| 2             | 7             | 0           | 1.225458                | -0.694533 | -1.630056 |
| 3             | 1             | 0           | 0.123219                | 0.099279  | -1.778463 |
| 4             | 7             | 0           | 0.519815                | -2.000954 | 1.792733  |
| 5             | 7             | 0           | -1.444447               | -0.938983 | 2.047128  |
| 6             | 6             | 0           | 0.613842                | 0.984066  | 0.474723  |
| 7             | 6             | 0           | 1.826552                | 1.115747  | -0.138005 |
| 8             | 6             | 0           | 2.145269                | 0.073471  | -1.153064 |
| 9             | 6             | 0           | 0.181875                | 1.933764  | 1.497397  |
| 10            | 6             | 0           | -0.803006               | 2.904870  | 1.235026  |
| 11            | 1             | 0           | -1.196990               | 2.986009  | 0.226658  |
| 12            | 6             | 0           | -1.277405               | 3.741932  | 2.238647  |
| 13            | 1             | 0           | -2.042257               | 4.477082  | 1.997430  |
| 14            | 6             | 0           | -0.787996               | 3.644678  | 3.540502  |
| 15            | 1             | 0           | -1.165054               | 4.296014  | 4.324612  |
| 16            | 6             | 0           | 0.202225                | 2.702260  | 3.814652  |
| 17            | 1             | 0           | 0.612601                | 2.619690  | 4.819213  |
| 18            | 6             | 0           | 0.681043                | 1.866878  | 2.811708  |
| 19            | 1             | 0           | 1.460093                | 1.144549  | 3.034096  |
| 20            | 6             | 0           | 2.779207                | 2.206785  | 0.213207  |
| 21            | 6             | 0           | 2.453950                | 3.541388  | -0.064155 |
| 22            | 1             | 0           | 1.510496                | 3.751965  | -0.559780 |
| 23            | 6             | 0           | 3.308567                | 4.579183  | 0.295314  |
| 24            | 1             | 0           | 3.031873                | 5.606721  | 0.071358  |
| 25            | 6             | 0           | 4.511403                | 4.305451  | 0.942720  |

|    |   |   |           |           |           |
|----|---|---|-----------|-----------|-----------|
| 26 | 1 | 0 | 5.180132  | 5.115049  | 1.224372  |
| 27 | 6 | 0 | 4.846077  | 2.983900  | 1.230823  |
| 28 | 1 | 0 | 5.779899  | 2.757272  | 1.740099  |
| 29 | 6 | 0 | 3.989804  | 1.948425  | 0.870399  |
| 30 | 1 | 0 | 4.259979  | 0.919936  | 1.091989  |
| 31 | 6 | 0 | 3.555626  | -0.132691 | -1.629294 |
| 32 | 6 | 0 | 4.366269  | 0.911507  | -2.087717 |
| 33 | 1 | 0 | 3.992666  | 1.930147  | -2.065074 |
| 34 | 6 | 0 | 5.644027  | 0.654568  | -2.578763 |
| 35 | 1 | 0 | 6.254730  | 1.477926  | -2.941026 |
| 36 | 6 | 0 | 6.141812  | -0.645521 | -2.599100 |
| 37 | 1 | 0 | 7.144631  | -0.842406 | -2.970297 |
| 38 | 6 | 0 | 5.341515  | -1.693539 | -2.146073 |
| 39 | 1 | 0 | 5.717017  | -2.713859 | -2.163232 |
| 40 | 6 | 0 | 4.056832  | -1.438486 | -1.681062 |
| 41 | 1 | 0 | 3.411075  | -2.249247 | -1.357493 |
| 42 | 6 | 0 | 1.787809  | -2.531231 | 2.246680  |
| 43 | 1 | 0 | 1.699503  | -2.916985 | 3.276363  |
| 44 | 6 | 0 | 2.190685  | -3.702314 | 1.355768  |
| 45 | 1 | 0 | 1.472873  | -4.520880 | 1.433629  |
| 46 | 1 | 0 | 3.184725  | -4.078196 | 1.622877  |
| 47 | 1 | 0 | 2.215427  | -3.375310 | 0.310941  |
| 48 | 6 | 0 | 2.897392  | -1.476101 | 2.222388  |
| 49 | 1 | 0 | 3.034077  | -1.113757 | 1.199752  |
| 50 | 1 | 0 | 3.848347  | -1.892787 | 2.576207  |
| 51 | 1 | 0 | 2.648911  | -0.609751 | 2.841406  |
| 52 | 6 | 0 | -0.332566 | -1.391206 | 2.618767  |
| 53 | 6 | 0 | -0.046063 | -1.221650 | 4.095320  |
| 54 | 1 | 0 | 1.021532  | -1.104230 | 4.286971  |
| 55 | 1 | 0 | -0.391039 | -2.102310 | 4.649024  |
| 56 | 1 | 0 | -0.558138 | -0.342914 | 4.490070  |
| 57 | 6 | 0 | -2.398562 | -0.088318 | 2.728774  |
| 58 | 1 | 0 | -1.877312 | 0.723772  | 3.263286  |
| 59 | 6 | 0 | -3.279642 | 0.570342  | 1.670930  |
| 60 | 1 | 0 | -2.665417 | 1.113346  | 0.947710  |
| 61 | 1 | 0 | -3.977080 | 1.284019  | 2.122533  |
| 62 | 1 | 0 | -3.856624 | -0.191975 | 1.135595  |
| 63 | 6 | 0 | -3.277176 | -0.845996 | 3.729699  |
| 64 | 1 | 0 | -3.859123 | -1.615037 | 3.211891  |
| 65 | 1 | 0 | -3.976586 | -0.161837 | 4.225355  |
| 66 | 1 | 0 | -2.684647 | -1.339686 | 4.505066  |
| 67 | 6 | 0 | -2.641200 | -2.130630 | -1.543272 |
| 68 | 6 | 0 | -2.618363 | -2.943782 | -0.379251 |
| 69 | 6 | 0 | -1.439169 | -3.732718 | -0.410655 |
| 70 | 6 | 0 | -0.723287 | -3.405542 | -1.592444 |
| 71 | 6 | 0 | -1.463843 | -2.414897 | -2.293698 |
| 72 | 6 | 0 | -3.775725 | -1.258534 | -1.985482 |
| 73 | 1 | 0 | -4.341089 | -0.868335 | -1.131621 |
| 74 | 1 | 0 | -4.487209 | -1.810934 | -2.615291 |
| 75 | 1 | 0 | -3.420958 | -0.398196 | -2.559476 |

|     |   |   |           |           |           |
|-----|---|---|-----------|-----------|-----------|
| 76  | 6 | 0 | -3.694198 | -3.098532 | 0.647672  |
| 77  | 1 | 0 | -3.276926 | -3.093592 | 1.659716  |
| 78  | 1 | 0 | -4.239443 | -4.044946 | 0.516928  |
| 79  | 1 | 0 | -4.432889 | -2.293299 | 0.592106  |
| 80  | 6 | 0 | -1.121978 | -4.789430 | 0.600974  |
| 81  | 1 | 0 | -0.255402 | -5.384010 | 0.297818  |
| 82  | 1 | 0 | -1.965677 | -5.482467 | 0.720825  |
| 83  | 1 | 0 | -0.903434 | -4.361492 | 1.587141  |
| 84  | 6 | 0 | 0.558135  | -4.002256 | -2.088313 |
| 85  | 1 | 0 | 1.016516  | -4.655848 | -1.339714 |
| 86  | 1 | 0 | 1.276586  | -3.211539 | -2.337408 |
| 87  | 1 | 0 | 0.397359  | -4.602353 | -2.994516 |
| 88  | 6 | 0 | -1.093838 | -1.872001 | -3.638573 |
| 89  | 1 | 0 | -1.634213 | -0.947098 | -3.858594 |
| 90  | 1 | 0 | -1.319899 | -2.592407 | -4.437965 |
| 91  | 1 | 0 | -0.023471 | -1.642653 | -3.679876 |
| 92  | 6 | 0 | -0.980116 | 0.825750  | -1.791311 |
| 93  | 6 | 0 | -1.825696 | 1.695325  | -1.985537 |
| 94  | 6 | 0 | -2.810450 | 2.708075  | -2.139735 |
| 95  | 6 | 0 | -2.527325 | 3.887169  | -2.852371 |
| 96  | 6 | 0 | -4.084398 | 2.563590  | -1.559577 |
| 97  | 6 | 0 | -3.488160 | 4.882069  | -2.981910 |
| 98  | 1 | 0 | -1.543610 | 4.006368  | -3.295950 |
| 99  | 6 | 0 | -5.037152 | 3.565099  | -1.692818 |
| 100 | 1 | 0 | -4.305576 | 1.658187  | -1.003684 |
| 101 | 6 | 0 | -4.747450 | 4.728449  | -2.404368 |
| 102 | 1 | 0 | -3.250539 | 5.786847  | -3.535701 |
| 103 | 1 | 0 | -6.014481 | 3.436540  | -1.234739 |
| 104 | 1 | 0 | -5.495697 | 5.509873  | -2.505560 |

### IM1

298 K, 1 atm, gas phase

Thermal correction to Enthalpy = 0.933873

Thermal correction to Gibbs Free Energy = 0.786995

Sum of electronic and thermal Enthalpies = -2024.097578

Sum of electronic and thermal Free Energies = -2024.244456

298 K, in THF

Sum of electronic and thermal Free Energies = -3220.970725

Standard orientation:

| Center<br>Number | Atomic<br>Number | Atomic<br>Type | Coordinates (Angstroms) |           |           |
|------------------|------------------|----------------|-------------------------|-----------|-----------|
|                  |                  |                | X                       | Y         | Z         |
| 1                | 71               | 0              | -1.411020               | -0.473449 | 0.170894  |
| 2                | 7                | 0              | 0.312827                | -0.631527 | 1.840143  |
| 3                | 1                | 0              | 0.386286                | -1.382889 | 2.519881  |
| 4                | 7                | 0              | -2.189535               | 1.569516  | 1.219548  |
| 5                | 7                | 0              | -2.702484               | 1.179795  | -0.930670 |

|    |   |   |           |           |           |
|----|---|---|-----------|-----------|-----------|
| 6  | 6 | 0 | 0.541643  | 1.072153  | -0.285270 |
| 7  | 6 | 0 | 1.601873  | 0.949185  | 0.573386  |
| 8  | 6 | 0 | 1.463076  | -0.066125 | 1.618301  |
| 9  | 6 | 0 | 0.536476  | 2.035358  | -1.378665 |
| 10 | 6 | 0 | 0.596758  | 1.609524  | -2.720915 |
| 11 | 1 | 0 | 0.721193  | 0.548296  | -2.916646 |
| 12 | 6 | 0 | 0.495136  | 2.518792  | -3.766188 |
| 13 | 1 | 0 | 0.548474  | 2.155731  | -4.790240 |
| 14 | 6 | 0 | 0.312023  | 3.879473  | -3.517205 |
| 15 | 1 | 0 | 0.217636  | 4.585269  | -4.338283 |
| 16 | 6 | 0 | 0.260689  | 4.316954  | -2.195456 |
| 17 | 1 | 0 | 0.135953  | 5.375545  | -1.976330 |
| 18 | 6 | 0 | 0.386211  | 3.414915  | -1.143921 |
| 19 | 1 | 0 | 0.376948  | 3.770500  | -0.119543 |
| 20 | 6 | 0 | 2.840380  | 1.774030  | 0.529148  |
| 21 | 6 | 0 | 3.530456  | 1.992224  | -0.672588 |
| 22 | 1 | 0 | 3.151696  | 1.542197  | -1.584685 |
| 23 | 6 | 0 | 4.673207  | 2.783952  | -0.712558 |
| 24 | 1 | 0 | 5.187552  | 2.932588  | -1.658845 |
| 25 | 6 | 0 | 5.158320  | 3.382795  | 0.448128  |
| 26 | 1 | 0 | 6.052669  | 3.999903  | 0.416566  |
| 27 | 6 | 0 | 4.479970  | 3.185960  | 1.648755  |
| 28 | 1 | 0 | 4.840567  | 3.652957  | 2.562247  |
| 29 | 6 | 0 | 3.336296  | 2.395437  | 1.685241  |
| 30 | 1 | 0 | 2.811904  | 2.252127  | 2.626750  |
| 31 | 6 | 0 | 2.642062  | -0.531294 | 2.402355  |
| 32 | 6 | 0 | 3.814720  | -0.934216 | 1.755346  |
| 33 | 1 | 0 | 3.875231  | -0.864357 | 0.673865  |
| 34 | 6 | 0 | 4.880948  | -1.438145 | 2.490798  |
| 35 | 1 | 0 | 5.781243  | -1.762568 | 1.976413  |
| 36 | 6 | 0 | 4.799185  | -1.524526 | 3.879665  |
| 37 | 1 | 0 | 5.639288  | -1.908530 | 4.452342  |
| 38 | 6 | 0 | 3.637120  | -1.118732 | 4.531005  |
| 39 | 1 | 0 | 3.567614  | -1.180460 | 5.613847  |
| 40 | 6 | 0 | 2.560623  | -0.633577 | 3.794629  |
| 41 | 1 | 0 | 1.649903  | -0.313158 | 4.295288  |
| 42 | 6 | 0 | -2.038206 | 2.381052  | 2.407342  |
| 43 | 1 | 0 | -2.887058 | 3.080530  | 2.513328  |
| 44 | 6 | 0 | -2.043442 | 1.470506  | 3.631860  |
| 45 | 1 | 0 | -2.968551 | 0.893643  | 3.685800  |
| 46 | 1 | 0 | -1.933324 | 2.049044  | 4.556495  |
| 47 | 1 | 0 | -1.206382 | 0.767703  | 3.555825  |
| 48 | 6 | 0 | -0.742108 | 3.200017  | 2.410903  |
| 49 | 1 | 0 | 0.108658  | 2.532771  | 2.243998  |
| 50 | 1 | 0 | -0.605769 | 3.723838  | 3.365202  |
| 51 | 1 | 0 | -0.731168 | 3.947727  | 1.613742  |
| 52 | 6 | 0 | -2.627876 | 2.062692  | 0.066294  |
| 53 | 6 | 0 | -3.012699 | 3.516011  | -0.115100 |
| 54 | 1 | 0 | -2.552137 | 4.160201  | 0.633378  |
| 55 | 1 | 0 | -4.098993 | 3.629682  | -0.033025 |



|     |   |   |           |           |           |
|-----|---|---|-----------|-----------|-----------|
| 56  | 1 | 0 | -2.706005 | 3.869702  | -1.102278 |
| 57  | 6 | 0 | -2.953812 | 1.566024  | -2.305053 |
| 58  | 1 | 0 | -2.299642 | 2.408469  | -2.592079 |
| 59  | 6 | 0 | -2.588118 | 0.387771  | -3.203535 |
| 60  | 1 | 0 | -1.565777 | 0.051907  | -3.013087 |
| 61  | 1 | 0 | -2.672344 | 0.657640  | -4.262213 |
| 62  | 1 | 0 | -3.258289 | -0.456145 | -3.006941 |
| 63  | 6 | 0 | -4.408108 | 1.968666  | -2.579378 |
| 64  | 1 | 0 | -5.077409 | 1.136086  | -2.339084 |
| 65  | 1 | 0 | -4.543210 | 2.220248  | -3.638521 |
| 66  | 1 | 0 | -4.722007 | 2.833861  | -1.990183 |
| 67  | 6 | 0 | -2.693975 | -2.804555 | -0.333665 |
| 68  | 6 | 0 | -3.733936 | -1.916481 | 0.041837  |
| 69  | 6 | 0 | -3.573396 | -1.600031 | 1.414831  |
| 70  | 6 | 0 | -2.437587 | -2.302332 | 1.897940  |
| 71  | 6 | 0 | -1.885284 | -3.039218 | 0.813988  |
| 72  | 6 | 0 | -2.526517 | -3.476430 | -1.661375 |
| 73  | 1 | 0 | -2.994830 | -2.899520 | -2.465576 |
| 74  | 1 | 0 | -2.981053 | -4.477835 | -1.669185 |
| 75  | 1 | 0 | -1.468460 | -3.577221 | -1.919502 |
| 76  | 6 | 0 | -4.894193 | -1.462669 | -0.785900 |
| 77  | 1 | 0 | -5.026606 | -0.378017 | -0.716885 |
| 78  | 1 | 0 | -5.830852 | -1.935417 | -0.455623 |
| 79  | 1 | 0 | -4.762619 | -1.713254 | -1.842648 |
| 80  | 6 | 0 | -4.534876 | -0.769808 | 2.207687  |
| 81  | 1 | 0 | -4.329998 | -0.843479 | 3.280717  |
| 82  | 1 | 0 | -5.568985 | -1.105517 | 2.050888  |
| 83  | 1 | 0 | -4.486373 | 0.291140  | 1.932189  |
| 84  | 6 | 0 | -1.996401 | -2.363525 | 3.329422  |
| 85  | 1 | 0 | -1.888621 | -1.372159 | 3.782180  |
| 86  | 1 | 0 | -1.035901 | -2.880602 | 3.430806  |
| 87  | 1 | 0 | -2.714034 | -2.921916 | 3.946524  |
| 88  | 6 | 0 | -0.710256 | -3.967474 | 0.859607  |
| 89  | 1 | 0 | -0.092555 | -3.858143 | -0.037662 |
| 90  | 1 | 0 | -1.019229 | -5.019936 | 0.935572  |
| 91  | 1 | 0 | -0.060997 | -3.761267 | 1.717702  |
| 92  | 6 | 0 | 0.127635  | -1.528490 | -1.388634 |
| 93  | 6 | 0 | 1.126946  | -1.983951 | -1.958442 |
| 94  | 6 | 0 | 2.347544  | -2.407632 | -2.552470 |
| 95  | 6 | 0 | 2.433250  | -3.576258 | -3.331696 |
| 96  | 6 | 0 | 3.524054  | -1.654113 | -2.363940 |
| 97  | 6 | 0 | 3.641094  | -3.972193 | -3.894117 |
| 98  | 1 | 0 | 1.533544  | -4.165411 | -3.483114 |
| 99  | 6 | 0 | 4.728449  | -2.055731 | -2.926892 |
| 100 | 1 | 0 | 3.466525  | -0.746373 | -1.770371 |
| 101 | 6 | 0 | 4.796421  | -3.217450 | -3.695792 |
| 102 | 1 | 0 | 3.682152  | -4.879757 | -4.492106 |
| 103 | 1 | 0 | 5.620815  | -1.455446 | -2.765553 |
| 104 | 1 | 0 | 5.739437  | -3.530732 | -4.136189 |

**TS1'a**

298 K, 1 atm, gas phase

Thermal correction to Enthalpy = 0.930558

Thermal correction to Gibbs Free Energy = 0.788557

Sum of electronic and thermal Enthalpies = -2024.051800

Sum of electronic and thermal Free Energies = -2024.193801

298 K, in THF

Sum of electronic and thermal Free Energies = -3220.916119

Standard orientation:

| Center<br>Number | Atomic<br>Number | Atomic<br>Type | Coordinates (Angstroms) |           |           |
|------------------|------------------|----------------|-------------------------|-----------|-----------|
|                  |                  |                | X                       | Y         | Z         |
| 1                | 7                | 0              | -0.957877               | -0.804216 | 1.145065  |
| 2                | 7                | 0              | 2.992577                | 0.635331  | -0.512125 |
| 3                | 7                | 0              | 2.177572                | 0.682511  | 1.591346  |
| 4                | 6                | 0              | -1.790165               | 0.112745  | 0.855049  |
| 5                | 6                | 0              | -1.378024               | 1.399981  | 0.169089  |
| 6                | 6                | 0              | -0.295939               | 1.351062  | -0.653378 |
| 7                | 6                | 0              | -3.259387               | -0.107719 | 1.121938  |
| 8                | 6                | 0              | -3.633909               | -0.978301 | 2.150544  |
| 9                | 1                | 0              | -2.839485               | -1.404543 | 2.757543  |
| 10               | 6                | 0              | -4.967972               | -1.307639 | 2.357723  |
| 11               | 1                | 0              | -5.241489               | -1.979885 | 3.168248  |
| 12               | 6                | 0              | -5.955419               | -0.786062 | 1.520798  |
| 13               | 1                | 0              | -6.998884               | -1.052858 | 1.671461  |
| 14               | 6                | 0              | -5.593506               | 0.073066  | 0.486596  |
| 15               | 1                | 0              | -6.352445               | 0.469967  | -0.182999 |
| 16               | 6                | 0              | -4.258573               | 0.418926  | 0.297171  |
| 17               | 1                | 0              | -3.982124               | 1.081442  | -0.517386 |
| 18               | 6                | 0              | 3.833382                | 1.151803  | -1.576295 |
| 19               | 1                | 0              | 3.819295                | 2.254230  | -1.576538 |
| 20               | 6                | 0              | 5.291189                | 0.693072  | -1.441214 |
| 21               | 1                | 0              | 5.707739                | 0.952642  | -0.463104 |
| 22               | 1                | 0              | 5.921750                | 1.149959  | -2.214028 |
| 23               | 1                | 0              | 5.359538                | -0.394076 | -1.547140 |
| 24               | 6                | 0              | 3.282966                | 0.730561  | -2.933776 |
| 25               | 1                | 0              | 3.165057                | -0.356366 | -2.982869 |
| 26               | 1                | 0              | 3.960299                | 1.036819  | -3.739001 |
| 27               | 1                | 0              | 2.317821                | 1.209467  | -3.114186 |
| 28               | 6                | 0              | 3.020885                | 1.195001  | 0.692470  |
| 29               | 6                | 0              | 3.921557                | 2.358285  | 1.058310  |
| 30               | 1                | 0              | 3.324210                | 3.199457  | 1.419898  |
| 31               | 1                | 0              | 4.512141                | 2.713016  | 0.216292  |
| 32               | 1                | 0              | 4.602626                | 2.069075  | 1.864833  |
| 33               | 6                | 0              | 2.078527                | 1.217014  | 2.932537  |
| 34               | 1                | 0              | 2.345655                | 2.285945  | 2.945219  |
| 35               | 6                | 0              | 3.026568                | 0.500700  | 3.898136  |

|    |    |   |           |           |           |
|----|----|---|-----------|-----------|-----------|
| 36 | 1  | 0 | 2.742591  | -0.551434 | 3.984174  |
| 37 | 1  | 0 | 2.989594  | 0.950773  | 4.897779  |
| 38 | 1  | 0 | 4.060722  | 0.539728  | 3.540089  |
| 39 | 6  | 0 | 0.635514  | 1.120850  | 3.414037  |
| 40 | 1  | 0 | -0.017578 | 1.705895  | 2.761575  |
| 41 | 1  | 0 | 0.538421  | 1.491846  | 4.441076  |
| 42 | 1  | 0 | 0.281159  | 0.086142  | 3.374147  |
| 43 | 6  | 0 | 1.187544  | -3.366488 | -0.647911 |
| 44 | 6  | 0 | 0.715089  | -3.431042 | 0.687486  |
| 45 | 6  | 0 | 1.746751  | -2.960245 | 1.541982  |
| 46 | 6  | 0 | 2.871592  | -2.623124 | 0.741858  |
| 47 | 6  | 0 | 2.521427  | -2.870141 | -0.614251 |
| 48 | 6  | 0 | 0.492733  | -3.893459 | -1.866684 |
| 49 | 1  | 0 | -0.592603 | -3.917948 | -1.736619 |
| 50 | 1  | 0 | 0.821475  | -4.915489 | -2.103710 |
| 51 | 1  | 0 | 0.685770  | -3.274278 | -2.748400 |
| 52 | 6  | 0 | -0.594038 | -3.965507 | 1.174383  |
| 53 | 1  | 0 | -1.204809 | -3.156520 | 1.597632  |
| 54 | 1  | 0 | -0.439853 | -4.725847 | 1.951791  |
| 55 | 1  | 0 | -1.161514 | -4.437001 | 0.366462  |
| 56 | 6  | 0 | 1.635497  | -2.931235 | 3.034968  |
| 57 | 1  | 0 | 2.582734  | -2.653020 | 3.504975  |
| 58 | 1  | 0 | 1.358074  | -3.919772 | 3.425264  |
| 59 | 1  | 0 | 0.866322  | -2.229928 | 3.381832  |
| 60 | 6  | 0 | 4.211877  | -2.152613 | 1.216592  |
| 61 | 1  | 0 | 4.983904  | -2.923799 | 1.085688  |
| 62 | 1  | 0 | 4.187101  | -1.885123 | 2.276447  |
| 63 | 1  | 0 | 4.535566  | -1.261255 | 0.668486  |
| 64 | 6  | 0 | 3.459142  | -2.833168 | -1.778819 |
| 65 | 1  | 0 | 2.935738  | -2.631272 | -2.719927 |
| 66 | 1  | 0 | 3.981332  | -3.793083 | -1.906477 |
| 67 | 1  | 0 | 4.224203  | -2.062968 | -1.652863 |
| 68 | 71 | 0 | 1.053394  | -0.760043 | 0.144427  |
| 69 | 6  | 0 | -0.197354 | -0.268376 | -2.170456 |
| 70 | 6  | 0 | 0.319659  | 2.521886  | -1.258384 |
| 71 | 6  | 0 | 0.289600  | 2.771647  | -2.644916 |
| 72 | 6  | 0 | 1.042903  | 3.431515  | -0.458918 |
| 73 | 6  | 0 | 0.963267  | 3.857624  | -3.199210 |
| 74 | 1  | 0 | -0.290553 | 2.110947  | -3.283699 |
| 75 | 6  | 0 | 1.717562  | 4.507995  | -1.015049 |
| 76 | 1  | 0 | 1.055347  | 3.265433  | 0.614462  |
| 77 | 6  | 0 | 1.691825  | 4.729007  | -2.394334 |
| 78 | 1  | 0 | 0.915278  | 4.022534  | -4.273579 |
| 79 | 1  | 0 | 2.265634  | 5.188440  | -0.366426 |
| 80 | 1  | 0 | 2.222556  | 5.571583  | -2.829442 |
| 81 | 6  | 0 | -2.096531 | 2.648531  | 0.528348  |
| 82 | 6  | 0 | -2.513091 | 2.864552  | 1.852811  |
| 83 | 6  | 0 | -2.380030 | 3.652781  | -0.411325 |
| 84 | 6  | 0 | -3.162515 | 4.035956  | 2.225634  |
| 85 | 1  | 0 | -2.325524 | 2.093937  | 2.595475  |

|     |   |   |           |           |           |
|-----|---|---|-----------|-----------|-----------|
| 86  | 6 | 0 | -3.034337 | 4.821846  | -0.040946 |
| 87  | 1 | 0 | -2.080216 | 3.506022  | -1.443493 |
| 88  | 6 | 0 | -3.427354 | 5.024677  | 1.280825  |
| 89  | 1 | 0 | -3.467938 | 4.173974  | 3.260162  |
| 90  | 1 | 0 | -3.240835 | 5.580094  | -0.792754 |
| 91  | 1 | 0 | -3.938429 | 5.939780  | 1.569316  |
| 92  | 6 | 0 | -1.173463 | -1.019838 | -2.365428 |
| 93  | 1 | 0 | 0.742586  | 0.065732  | -2.580658 |
| 94  | 6 | 0 | -2.452808 | -1.616971 | -2.285043 |
| 95  | 6 | 0 | -2.851072 | -2.367765 | -1.160636 |
| 96  | 6 | 0 | -3.367779 | -1.459654 | -3.346283 |
| 97  | 6 | 0 | -4.111731 | -2.942944 | -1.112250 |
| 98  | 1 | 0 | -2.181855 | -2.424982 | -0.309300 |
| 99  | 6 | 0 | -4.634432 | -2.023958 | -3.274575 |
| 100 | 1 | 0 | -3.069214 | -0.885284 | -4.218484 |
| 101 | 6 | 0 | -5.013864 | -2.774352 | -2.162355 |
| 102 | 1 | 0 | -4.407073 | -3.485993 | -0.218876 |
| 103 | 1 | 0 | -5.330848 | -1.878900 | -4.097148 |
| 104 | 1 | 0 | -6.008400 | -3.208447 | -2.106662 |

### IM1'a

298 K, 1 atm, gas phase

Thermal correction to Enthalpy = 0.933461

Thermal correction to Gibbs Free Energy = 0.790281

Sum of electronic and thermal Enthalpies = -2024.115397

Sum of electronic and thermal Free Energies = -2024.258577

298 K, in THF

Sum of electronic and thermal Free Energies = -3220.982742

Standard orientation:

| Center<br>Number | Atomic<br>Number | Atomic<br>Type | Coordinates (Angstroms) |           |           |
|------------------|------------------|----------------|-------------------------|-----------|-----------|
|                  |                  |                | X                       | Y         | Z         |
| 1                | 7                | 0              | 0.345501                | -0.985088 | -0.936367 |
| 2                | 7                | 0              | -2.751788               | 1.746146  | 0.527263  |
| 3                | 7                | 0              | -1.759940               | 1.561565  | -1.478951 |
| 4                | 6                | 0              | 1.566192                | -0.865720 | -0.639706 |
| 5                | 6                | 0              | 2.225972                | 0.432567  | -0.161309 |
| 6                | 6                | 0              | 1.615596                | 1.299683  | 0.696121  |
| 7                | 6                | 0              | 2.509542                | -2.030429 | -0.790135 |
| 8                | 6                | 0              | 2.306386                | -2.959593 | -1.813983 |
| 9                | 1                | 0              | 1.487855                | -2.779166 | -2.506318 |
| 10               | 6                | 0              | 3.118024                | -4.082473 | -1.925650 |
| 11               | 1                | 0              | 2.956729                | -4.790410 | -2.735584 |
| 12               | 6                | 0              | 4.133764                | -4.305424 | -0.995372 |
| 13               | 1                | 0              | 4.763115                | -5.188867 | -1.073991 |
| 14               | 6                | 0              | 4.330882                | -3.393982 | 0.039320  |
| 15               | 1                | 0              | 5.102527                | -3.571239 | 0.784454  |

|    |   |   |           |           |           |
|----|---|---|-----------|-----------|-----------|
| 16 | 6 | 0 | 3.533608  | -2.257279 | 0.132812  |
| 17 | 1 | 0 | 3.674879  | -1.557197 | 0.952038  |
| 18 | 6 | 0 | -3.170625 | 2.483951  | 1.703887  |
| 19 | 1 | 0 | -2.496806 | 3.338831  | 1.891279  |
| 20 | 6 | 0 | -4.595592 | 3.029068  | 1.559229  |
| 21 | 1 | 0 | -4.697390 | 3.673378  | 0.679923  |
| 22 | 1 | 0 | -4.890115 | 3.606249  | 2.444384  |
| 23 | 1 | 0 | -5.299680 | 2.199083  | 1.442611  |
| 24 | 6 | 0 | -3.074010 | 1.575184  | 2.925106  |
| 25 | 1 | 0 | -3.779185 | 0.743238  | 2.829981  |
| 26 | 1 | 0 | -3.315018 | 2.125960  | 3.841781  |
| 27 | 1 | 0 | -2.070893 | 1.144711  | 3.008606  |
| 28 | 6 | 0 | -2.266077 | 2.364729  | -0.546889 |
| 29 | 6 | 0 | -2.180448 | 3.872090  | -0.675732 |
| 30 | 1 | 0 | -1.129520 | 4.181411  | -0.634772 |
| 31 | 1 | 0 | -2.714960 | 4.389318  | 0.119215  |
| 32 | 1 | 0 | -2.586259 | 4.204468  | -1.635155 |
| 33 | 6 | 0 | -1.224273 | 2.089110  | -2.716037 |
| 34 | 1 | 0 | -0.861338 | 3.120398  | -2.579086 |
| 35 | 6 | 0 | -2.303373 | 2.117711  | -3.801985 |
| 36 | 1 | 0 | -2.642247 | 1.098324  | -4.012789 |
| 37 | 1 | 0 | -1.923058 | 2.555834  | -4.732928 |
| 38 | 1 | 0 | -3.175690 | 2.695014  | -3.476649 |
| 39 | 6 | 0 | -0.026830 | 1.262883  | -3.167537 |
| 40 | 1 | 0 | 0.756896  | 1.287070  | -2.407083 |
| 41 | 1 | 0 | 0.373316  | 1.646564  | -4.113730 |
| 42 | 1 | 0 | -0.308930 | 0.213928  | -3.300285 |
| 43 | 6 | 0 | -3.098234 | -2.459677 | 0.632423  |
| 44 | 6 | 0 | -2.315716 | -2.848564 | -0.489988 |
| 45 | 6 | 0 | -2.753124 | -2.095740 | -1.614721 |
| 46 | 6 | 0 | -3.818682 | -1.254942 | -1.194680 |
| 47 | 6 | 0 | -4.030005 | -1.480714 | 0.190454  |
| 48 | 6 | 0 | -3.048985 | -3.046783 | 2.011393  |
| 49 | 1 | 0 | -2.077143 | -3.497882 | 2.228903  |
| 50 | 1 | 0 | -3.812304 | -3.825683 | 2.149580  |
| 51 | 1 | 0 | -3.215762 | -2.284157 | 2.779308  |
| 52 | 6 | 0 | -1.255123 | -3.905034 | -0.550332 |
| 53 | 1 | 0 | -0.278616 | -3.473715 | -0.803650 |
| 54 | 1 | 0 | -1.496595 | -4.656320 | -1.313924 |
| 55 | 1 | 0 | -1.158892 | -4.436054 | 0.401865  |
| 56 | 6 | 0 | -2.154083 | -2.213931 | -2.981836 |
| 57 | 1 | 0 | -2.494786 | -1.411897 | -3.644345 |
| 58 | 1 | 0 | -2.412316 | -3.168983 | -3.460828 |
| 59 | 1 | 0 | -1.060026 | -2.157145 | -2.922520 |
| 60 | 6 | 0 | -4.631544 | -0.313047 | -2.028070 |
| 61 | 1 | 0 | -5.686544 | -0.618544 | -2.061293 |
| 62 | 1 | 0 | -4.269092 | -0.275650 | -3.058535 |
| 63 | 1 | 0 | -4.594973 | 0.708781  | -1.631965 |
| 64 | 6 | 0 | -5.150102 | -0.888849 | 0.984443  |
| 65 | 1 | 0 | -4.984377 | -0.992975 | 2.061094  |

|     |    |   |           |           |           |
|-----|----|---|-----------|-----------|-----------|
| 66  | 1  | 0 | -6.107623 | -1.380508 | 0.757675  |
| 67  | 1  | 0 | -5.269636 | 0.177003  | 0.766748  |
| 68  | 71 | 0 | -1.610503 | -0.314675 | -0.042006 |
| 69  | 6  | 0 | 0.327260  | 0.958156  | 1.333243  |
| 70  | 6  | 0 | 2.019792  | 2.717082  | 0.870406  |
| 71  | 6  | 0 | 1.941224  | 3.310086  | 2.138271  |
| 72  | 6  | 0 | 2.363310  | 3.533684  | -0.218349 |
| 73  | 6  | 0 | 2.238961  | 4.656761  | 2.322301  |
| 74  | 1  | 0 | 1.631777  | 2.696366  | 2.980420  |
| 75  | 6  | 0 | 2.648607  | 4.881849  | -0.037787 |
| 76  | 1  | 0 | 2.398403  | 3.096828  | -1.211570 |
| 77  | 6  | 0 | 2.596730  | 5.449766  | 1.234749  |
| 78  | 1  | 0 | 2.180735  | 5.090351  | 3.317660  |
| 79  | 1  | 0 | 2.907459  | 5.494887  | -0.897528 |
| 80  | 1  | 0 | 2.820716  | 6.504255  | 1.374255  |
| 81  | 6  | 0 | 3.529514  | 0.744990  | -0.787931 |
| 82  | 6  | 0 | 3.733672  | 0.530947  | -2.159498 |
| 83  | 6  | 0 | 4.607436  | 1.222779  | -0.027748 |
| 84  | 6  | 0 | 4.957932  | 0.817492  | -2.753285 |
| 85  | 1  | 0 | 2.916299  | 0.138832  | -2.758488 |
| 86  | 6  | 0 | 5.832335  | 1.504196  | -0.619609 |
| 87  | 1  | 0 | 4.466776  | 1.367202  | 1.039503  |
| 88  | 6  | 0 | 6.013487  | 1.308132  | -1.987868 |
| 89  | 1  | 0 | 5.089531  | 0.650628  | -3.819459 |
| 90  | 1  | 0 | 6.652320  | 1.873829  | -0.008811 |
| 91  | 1  | 0 | 6.972396  | 1.525833  | -2.451126 |
| 92  | 6  | 0 | -0.088566 | -0.175755 | 1.950821  |
| 93  | 1  | 0 | -0.431408 | 1.727022  | 1.122619  |
| 94  | 6  | 0 | 0.890028  | -1.129255 | 2.461142  |
| 95  | 6  | 0 | 0.766098  | -2.508069 | 2.209198  |
| 96  | 6  | 0 | 1.956939  | -0.724161 | 3.290089  |
| 97  | 6  | 0 | 1.673701  | -3.425871 | 2.719314  |
| 98  | 1  | 0 | -0.044953 | -2.840581 | 1.570321  |
| 99  | 6  | 0 | 2.850000  | -1.645524 | 3.825615  |
| 100 | 1  | 0 | 2.066968  | 0.334438  | 3.512498  |
| 101 | 6  | 0 | 2.719766  | -3.004737 | 3.540204  |
| 102 | 1  | 0 | 1.566375  | -4.478821 | 2.470381  |
| 103 | 1  | 0 | 3.659658  | -1.299929 | 4.465588  |
| 104 | 1  | 0 | 3.422515  | -3.724762 | 3.951549  |

### TS1'b

298 K, 1 atm, gas phase

Thermal correction to Enthalpy = 0.927345

Thermal correction to Gibbs Free Energy = 0.780324

Sum of electronic and thermal Enthalpies = -2024.041871

Sum of electronic and thermal Free Energies = -2024.188892

298 K, in THF

Sum of electronic and thermal Free Energies = -3220.917683

## Standard orientation:

| Center<br>Number | Atomic<br>Number | Atomic<br>Type | Coordinates (Angstroms) |           |           |
|------------------|------------------|----------------|-------------------------|-----------|-----------|
|                  |                  |                | X                       | Y         | Z         |
| 1                | 71               | 0              | 0.977094                | -0.807052 | -0.176371 |
| 2                | 1                | 0              | -0.147073               | 0.599631  | 1.169479  |
| 3                | 7                | 0              | 0.121939                | -2.302278 | -1.785419 |
| 4                | 7                | 0              | 1.833140                | -0.962500 | -2.366710 |
| 5                | 6                | 0              | -1.510225               | 0.918589  | -1.071218 |
| 6                | 6                | 0              | -2.178483               | 0.342071  | 0.160043  |
| 7                | 6                | 0              | -2.321430               | 1.718577  | -2.059597 |
| 8                | 6                | 0              | -1.753744               | 2.881663  | -2.593368 |
| 9                | 1                | 0              | -0.775434               | 3.177748  | -2.224672 |
| 10               | 6                | 0              | -2.411046               | 3.615247  | -3.573503 |
| 11               | 1                | 0              | -1.958543               | 4.524370  | -3.963561 |
| 12               | 6                | 0              | -3.644748               | 3.184412  | -4.063297 |
| 13               | 1                | 0              | -4.157876               | 3.752545  | -4.835645 |
| 14               | 6                | 0              | -4.210328               | 2.017768  | -3.556540 |
| 15               | 1                | 0              | -5.166883               | 1.666135  | -3.936435 |
| 16               | 6                | 0              | -3.560133               | 1.297332  | -2.556638 |
| 17               | 1                | 0              | -4.018772               | 0.396512  | -2.160330 |
| 18               | 6                | 0              | -3.623295               | 0.576239  | 0.423200  |
| 19               | 6                | 0              | -4.093584               | 1.884006  | 0.607743  |
| 20               | 1                | 0              | -3.390333               | 2.708685  | 0.530699  |
| 21               | 6                | 0              | -5.434975               | 2.131959  | 0.874105  |
| 22               | 1                | 0              | -5.775349               | 3.154996  | 1.014335  |
| 23               | 6                | 0              | -6.342107               | 1.076806  | 0.955174  |
| 24               | 1                | 0              | -7.392125               | 1.270203  | 1.159370  |
| 25               | 6                | 0              | -5.890256               | -0.227117 | 0.771284  |
| 26               | 1                | 0              | -6.587213               | -1.059438 | 0.833143  |
| 27               | 6                | 0              | -4.545383               | -0.474169 | 0.509991  |
| 28               | 1                | 0              | -4.200285               | -1.492214 | 0.360477  |
| 29               | 6                | 0              | -1.041548               | -3.122364 | -2.044527 |
| 30               | 1                | 0              | -0.875827               | -3.749995 | -2.938061 |
| 31               | 6                | 0              | -1.241279               | -4.066496 | -0.863980 |
| 32               | 1                | 0              | -0.371442               | -4.714514 | -0.731975 |
| 33               | 1                | 0              | -2.132180               | -4.690393 | -0.998170 |
| 34               | 1                | 0              | -1.364311               | -3.480459 | 0.053297  |
| 35               | 6                | 0              | -2.312682               | -2.297884 | -2.266021 |
| 36               | 1                | 0              | -2.525505               | -1.716554 | -1.364532 |
| 37               | 1                | 0              | -3.172127               | -2.945719 | -2.479268 |
| 38               | 1                | 0              | -2.202247               | -1.586621 | -3.088422 |
| 39               | 6                | 0              | 0.775772                | -1.666202 | -2.758601 |
| 40               | 6                | 0              | 0.294471                | -1.646411 | -4.190024 |
| 41               | 1                | 0              | -0.305802               | -0.740923 | -4.335755 |
| 42               | 1                | 0              | -0.331070               | -2.508768 | -4.425671 |
| 43               | 1                | 0              | 1.128407                | -1.616326 | -4.893783 |
| 44               | 6                | 0              | 2.423228                | 0.040470  | -3.233465 |
| 45               | 1                | 0              | 1.675247                | 0.438516  | -3.937165 |

|    |   |   |           |           |           |
|----|---|---|-----------|-----------|-----------|
| 46 | 6 | 0 | 2.877064  | 1.217060  | -2.371576 |
| 47 | 1 | 0 | 2.009199  | 1.656769  | -1.869565 |
| 48 | 1 | 0 | 3.366604  | 1.989940  | -2.975940 |
| 49 | 1 | 0 | 3.593732  | 0.872302  | -1.615209 |
| 50 | 6 | 0 | 3.596244  | -0.519464 | -4.042974 |
| 51 | 1 | 0 | 4.399273  | -0.837765 | -3.371196 |
| 52 | 1 | 0 | 3.999067  | 0.236977  | -4.727814 |
| 53 | 1 | 0 | 3.296159  | -1.391048 | -4.634271 |
| 54 | 6 | 0 | 3.196034  | -0.950082 | 1.329356  |
| 55 | 6 | 0 | 3.400037  | -1.937264 | 0.330232  |
| 56 | 6 | 0 | 2.472339  | -2.986846 | 0.545733  |
| 57 | 6 | 0 | 1.689565  | -2.657136 | 1.684003  |
| 58 | 6 | 0 | 2.135236  | -1.396128 | 2.172353  |
| 59 | 6 | 0 | 4.061760  | 0.247341  | 1.575128  |
| 60 | 1 | 0 | 4.477709  | 0.649225  | 0.644153  |
| 61 | 1 | 0 | 4.913247  | 0.000370  | 2.225175  |
| 62 | 1 | 0 | 3.502581  | 1.055193  | 2.053321  |
| 63 | 6 | 0 | 4.476886  | -1.966821 | -0.706494 |
| 64 | 1 | 0 | 4.083943  | -2.315007 | -1.666036 |
| 65 | 1 | 0 | 5.298031  | -2.636224 | -0.410967 |
| 66 | 1 | 0 | 4.912980  | -0.976147 | -0.869843 |
| 67 | 6 | 0 | 2.414323  | -4.239751 | -0.272549 |
| 68 | 1 | 0 | 1.762998  | -4.987089 | 0.190860  |
| 69 | 1 | 0 | 3.409712  | -4.692443 | -0.370506 |
| 70 | 1 | 0 | 2.032396  | -4.046957 | -1.282653 |
| 71 | 6 | 0 | 0.702679  | -3.551271 | 2.371175  |
| 72 | 1 | 0 | 0.222526  | -4.242448 | 1.672203  |
| 73 | 1 | 0 | -0.092827 | -2.983601 | 2.861103  |
| 74 | 1 | 0 | 1.190878  | -4.160039 | 3.145655  |
| 75 | 6 | 0 | 1.724520  | -0.761608 | 3.465046  |
| 76 | 1 | 0 | 1.757741  | 0.330370  | 3.405171  |
| 77 | 1 | 0 | 2.388125  | -1.071127 | 4.285651  |
| 78 | 1 | 0 | 0.704908  | -1.036955 | 3.747202  |
| 79 | 6 | 0 | 0.840839  | 1.451112  | 1.148759  |
| 80 | 6 | 0 | 1.418027  | 2.522825  | 1.303639  |
| 81 | 6 | 0 | 2.156700  | 3.730626  | 1.433296  |
| 82 | 6 | 0 | 1.795258  | 4.707844  | 2.376392  |
| 83 | 6 | 0 | 3.276359  | 3.966267  | 0.614826  |
| 84 | 6 | 0 | 2.530036  | 5.881277  | 2.494021  |
| 85 | 1 | 0 | 0.931789  | 4.530074  | 3.010122  |
| 86 | 6 | 0 | 4.007467  | 5.139997  | 0.742761  |
| 87 | 1 | 0 | 3.554255  | 3.214026  | -0.117100 |
| 88 | 6 | 0 | 3.639770  | 6.103815  | 1.680805  |
| 89 | 1 | 0 | 2.235132  | 6.627123  | 3.227831  |
| 90 | 1 | 0 | 4.870442  | 5.305050  | 0.102810  |
| 91 | 1 | 0 | 4.213521  | 7.021663  | 1.776734  |
| 92 | 7 | 0 | -0.271186 | 0.754048  | -1.286833 |
| 93 | 6 | 0 | -1.354426 | -0.234249 | 1.081160  |
| 94 | 6 | 0 | -1.857296 | -0.687857 | 2.384848  |
| 95 | 6 | 0 | -1.711084 | 0.136083  | 3.515824  |



|     |   |   |           |           |          |
|-----|---|---|-----------|-----------|----------|
| 96  | 6 | 0 | -2.447526 | -1.947503 | 2.578603 |
| 97  | 6 | 0 | -2.140932 | -0.277316 | 4.771525 |
| 98  | 1 | 0 | -1.247920 | 1.111348  | 3.391214 |
| 99  | 6 | 0 | -2.875547 | -2.362525 | 3.835986 |
| 100 | 1 | 0 | -2.556356 | -2.612101 | 1.726173 |
| 101 | 6 | 0 | -2.726305 | -1.530890 | 4.942930 |
| 102 | 1 | 0 | -2.015634 | 0.385339  | 5.624841 |
| 103 | 1 | 0 | -3.327042 | -3.345468 | 3.949751 |
| 104 | 1 | 0 | -3.058902 | -1.855125 | 5.925438 |

**IM1'b**

298 K, 1 atm, gas phase

Thermal correction to Enthalpy = 0.933571

Thermal correction to Gibbs Free Energy = 0.783981

Sum of electronic and thermal Enthalpies = -2024.108322

Sum of electronic and thermal Free Energies = -2024.257911

298 K, in THF

Sum of electronic and thermal Free Energies = -3220.986666

Standard orientation:

| Center<br>Number | Atomic<br>Number | Atomic<br>Type | Coordinates (Angstroms) |           |           |
|------------------|------------------|----------------|-------------------------|-----------|-----------|
|                  |                  |                | X                       | Y         | Z         |
| 1                | 71               | 0              | 1.739407                | 0.016323  | -0.395310 |
| 2                | 1                | 0              | -2.615382               | -0.842459 | 0.063987  |
| 3                | 7                | 0              | 3.251468                | 1.128061  | 1.112760  |
| 4                | 7                | 0              | 3.674251                | -1.002222 | 0.548388  |
| 5                | 6                | 0              | -1.034226               | 0.616621  | 1.327747  |
| 6                | 6                | 0              | -2.290366               | 1.115401  | 0.632602  |
| 7                | 6                | 0              | -1.247918               | -0.225824 | 2.556402  |
| 8                | 6                | 0              | -0.180399               | -0.975401 | 3.062337  |
| 9                | 1                | 0              | 0.771811                | -0.912670 | 2.543769  |
| 10               | 6                | 0              | -0.349139               | -1.792397 | 4.172375  |
| 11               | 1                | 0              | 0.486188                | -2.383158 | 4.540120  |
| 12               | 6                | 0              | -1.590853               | -1.868014 | 4.805895  |
| 13               | 1                | 0              | -1.725304               | -2.512358 | 5.671305  |
| 14               | 6                | 0              | -2.657754               | -1.116870 | 4.318943  |
| 15               | 1                | 0              | -3.628706               | -1.169527 | 4.805616  |
| 16               | 6                | 0              | -2.486887               | -0.304863 | 3.199975  |
| 17               | 1                | 0              | -3.324926               | 0.263354  | 2.806998  |
| 18               | 6                | 0              | -2.628355               | 2.544308  | 0.775516  |
| 19               | 6                | 0              | -3.954932               | 2.944182  | 1.002801  |
| 20               | 1                | 0              | -4.734896               | 2.188185  | 1.019966  |
| 21               | 6                | 0              | -4.273381               | 4.282510  | 1.199111  |
| 22               | 1                | 0              | -5.307843               | 4.568378  | 1.373272  |
| 23               | 6                | 0              | -3.272921               | 5.253578  | 1.180021  |
| 24               | 1                | 0              | -3.522400               | 6.300572  | 1.332234  |
| 25               | 6                | 0              | -1.950899               | 4.867462  | 0.971378  |

|    |   |   |           |           |           |
|----|---|---|-----------|-----------|-----------|
| 26 | 1 | 0 | -1.159463 | 5.612718  | 0.960022  |
| 27 | 6 | 0 | -1.629252 | 3.528332  | 0.777236  |
| 28 | 1 | 0 | -0.603268 | 3.213950  | 0.618700  |
| 29 | 6 | 0 | 3.160735  | 2.229218  | 2.048252  |
| 30 | 1 | 0 | 4.161030  | 2.491563  | 2.439783  |
| 31 | 6 | 0 | 2.634714  | 3.449564  | 1.300330  |
| 32 | 1 | 0 | 3.308500  | 3.724590  | 0.484815  |
| 33 | 1 | 0 | 2.520239  | 4.308547  | 1.970894  |
| 34 | 1 | 0 | 1.656299  | 3.211171  | 0.869702  |
| 35 | 6 | 0 | 2.245006  | 1.909534  | 3.233946  |
| 36 | 1 | 0 | 1.252958  | 1.647291  | 2.853617  |
| 37 | 1 | 0 | 2.157678  | 2.766498  | 3.913052  |
| 38 | 1 | 0 | 2.618402  | 1.057484  | 3.811292  |
| 39 | 6 | 0 | 3.893334  | 0.001653  | 1.398344  |
| 40 | 6 | 0 | 4.763108  | -0.168978 | 2.627206  |
| 41 | 1 | 0 | 4.250192  | -0.803855 | 3.357986  |
| 42 | 1 | 0 | 4.983273  | 0.786454  | 3.104529  |
| 43 | 1 | 0 | 5.707242  | -0.658297 | 2.378122  |
| 44 | 6 | 0 | 4.349977  | -2.273871 | 0.686792  |
| 45 | 1 | 0 | 4.452873  | -2.551048 | 1.751394  |
| 46 | 6 | 0 | 3.518792  | -3.359436 | 0.013610  |
| 47 | 1 | 0 | 2.512940  | -3.405112 | 0.437820  |
| 48 | 1 | 0 | 4.001942  | -4.339115 | 0.106763  |
| 49 | 1 | 0 | 3.400517  | -3.130669 | -1.051611 |
| 50 | 6 | 0 | 5.756187  | -2.240370 | 0.074880  |
| 51 | 1 | 0 | 5.685181  | -2.050147 | -0.999968 |
| 52 | 1 | 0 | 6.276258  | -3.194647 | 0.224517  |
| 53 | 1 | 0 | 6.370899  | -1.444846 | 0.508863  |
| 54 | 6 | 0 | 1.800575  | -0.538815 | -3.018456 |
| 55 | 6 | 0 | 3.008939  | 0.160136  | -2.764196 |
| 56 | 6 | 0 | 2.679296  | 1.494930  | -2.400257 |
| 57 | 6 | 0 | 1.262833  | 1.623227  | -2.435992 |
| 58 | 6 | 0 | 0.719502  | 0.362518  | -2.807307 |
| 59 | 6 | 0 | 1.658276  | -1.952465 | -3.492001 |
| 60 | 1 | 0 | 2.574868  | -2.527479 | -3.324785 |
| 61 | 1 | 0 | 1.438271  | -1.997035 | -4.568003 |
| 62 | 1 | 0 | 0.852748  | -2.466159 | -2.957944 |
| 63 | 6 | 0 | 4.405372  | -0.350233 | -2.934233 |
| 64 | 1 | 0 | 5.056927  | -0.011355 | -2.121817 |
| 65 | 1 | 0 | 4.851651  | -0.006704 | -3.879026 |
| 66 | 1 | 0 | 4.435588  | -1.444249 | -2.941112 |
| 67 | 6 | 0 | 3.682906  | 2.576671  | -2.141166 |
| 68 | 1 | 0 | 3.192481  | 3.511121  | -1.854013 |
| 69 | 1 | 0 | 4.284807  | 2.787150  | -3.036330 |
| 70 | 1 | 0 | 4.373462  | 2.307911  | -1.333006 |
| 71 | 6 | 0 | 0.473732  | 2.871902  | -2.186389 |
| 72 | 1 | 0 | 0.981338  | 3.540839  | -1.483340 |
| 73 | 1 | 0 | -0.504822 | 2.642431  | -1.755514 |
| 74 | 1 | 0 | 0.303924  | 3.439680  | -3.111998 |
| 75 | 6 | 0 | -0.730476 | 0.035357  | -2.990179 |

|     |   |   |           |           |           |
|-----|---|---|-----------|-----------|-----------|
| 76  | 1 | 0 | -0.958303 | -0.967876 | -2.615791 |
| 77  | 1 | 0 | -1.030239 | 0.079180  | -4.046669 |
| 78  | 1 | 0 | -1.371790 | 0.728035  | -2.438569 |
| 79  | 6 | 0 | 0.395487  | -1.975648 | -0.318331 |
| 80  | 6 | 0 | -0.604669 | -2.695516 | -0.227039 |
| 81  | 6 | 0 | -1.839152 | -3.388462 | -0.084044 |
| 82  | 6 | 0 | -2.483249 | -3.448104 | 1.168736  |
| 83  | 6 | 0 | -2.492690 | -3.959048 | -1.192819 |
| 84  | 6 | 0 | -3.731814 | -4.043631 | 1.296422  |
| 85  | 1 | 0 | -1.996279 | -2.997620 | 2.028382  |
| 86  | 6 | 0 | -3.740225 | -4.556276 | -1.055807 |
| 87  | 1 | 0 | -2.010163 | -3.904968 | -2.164145 |
| 88  | 6 | 0 | -4.370034 | -4.600937 | 0.187877  |
| 89  | 1 | 0 | -4.213952 | -4.061835 | 2.270819  |
| 90  | 1 | 0 | -4.230338 | -4.980435 | -1.928958 |
| 91  | 1 | 0 | -5.349590 | -5.060610 | 0.290844  |
| 92  | 7 | 0 | 0.093762  | 0.845903  | 0.822766  |
| 93  | 6 | 0 | -2.965056 | 0.180561  | -0.069852 |
| 94  | 6 | 0 | -4.054371 | 0.300328  | -1.040192 |
| 95  | 6 | 0 | -4.858405 | -0.829295 | -1.267888 |
| 96  | 6 | 0 | -4.298569 | 1.450452  | -1.808874 |
| 97  | 6 | 0 | -5.892570 | -0.797708 | -2.196152 |
| 98  | 1 | 0 | -4.655186 | -1.741158 | -0.710337 |
| 99  | 6 | 0 | -5.329907 | 1.477647  | -2.739224 |
| 100 | 1 | 0 | -3.661220 | 2.319394  | -1.681416 |
| 101 | 6 | 0 | -6.138992 | 0.358317  | -2.933605 |
| 102 | 1 | 0 | -6.500224 | -1.685868 | -2.351314 |
| 103 | 1 | 0 | -5.495692 | 2.377010  | -3.327201 |
| 104 | 1 | 0 | -6.942646 | 0.383148  | -3.665113 |

## TS2

298 K, 1 atm, gas phase

Thermal correction to Enthalpy = 0.931891

Thermal correction to Gibbs Free Energy = 0.789106

Sum of electronic and thermal Enthalpies = -2024.081933

Sum of electronic and thermal Free Energies = -2024.224719

298 K, in THF

Sum of electronic and thermal Free Energies = -3220.948425

Standard orientation:

| Center<br>Number | Atomic<br>Number | Atomic<br>Type | Coordinates (Angstroms) |           |           |
|------------------|------------------|----------------|-------------------------|-----------|-----------|
|                  |                  |                | X                       | Y         | Z         |
| 1                | 71               | 0              | 1.429424                | 0.057938  | -0.416870 |
| 2                | 6                | 0              | -0.576793               | -0.267927 | 0.924949  |
| 3                | 7                | 0              | 0.138326                | 2.018766  | -0.338389 |
| 4                | 6                | 0              | -1.047054               | 1.997564  | 0.258389  |
| 5                | 6                | 0              | -1.513023               | 0.816092  | 0.889744  |

|    |   |   |           |           |           |
|----|---|---|-----------|-----------|-----------|
| 6  | 6 | 0 | -1.853571 | 3.251325  | 0.264428  |
| 7  | 6 | 0 | -2.529066 | 3.668117  | 1.417709  |
| 8  | 6 | 0 | -3.230516 | 4.867743  | 1.434031  |
| 9  | 6 | 0 | -3.278556 | 5.670315  | 0.294976  |
| 10 | 6 | 0 | -2.615645 | 5.263562  | -0.860123 |
| 11 | 6 | 0 | -1.905612 | 4.066841  | -0.872450 |
| 12 | 7 | 0 | 2.696479  | -1.400218 | 0.988993  |
| 13 | 6 | 0 | 3.235549  | -0.408353 | 1.685662  |
| 14 | 6 | 0 | 4.268368  | -0.621338 | 2.773032  |
| 15 | 7 | 0 | 2.837359  | 0.814224  | 1.333530  |
| 16 | 6 | 0 | 3.054355  | 1.962660  | 2.177966  |
| 17 | 6 | 0 | 3.080614  | 3.230203  | 1.330681  |
| 18 | 6 | 0 | 1.528566  | 0.495270  | -3.036916 |
| 19 | 6 | 0 | 2.121907  | -0.789171 | -2.879160 |
| 20 | 6 | 0 | 3.381396  | -0.610370 | -2.243565 |
| 21 | 6 | 0 | 3.562449  | 0.776471  | -2.006372 |
| 22 | 6 | 0 | 2.424380  | 1.461869  | -2.504358 |
| 23 | 6 | 0 | 0.220156  | 0.772375  | -3.710450 |
| 24 | 6 | 0 | 1.546681  | -2.067342 | -3.411158 |
| 25 | 6 | 0 | 4.433738  | -1.640390 | -1.970611 |
| 26 | 6 | 0 | 4.802854  | 1.382826  | -1.427190 |
| 27 | 6 | 0 | 2.255178  | 2.948916  | -2.566553 |
| 28 | 6 | 0 | 2.983291  | -2.797403 | 1.234409  |
| 29 | 6 | 0 | 2.308731  | -3.612706 | 0.135193  |
| 30 | 6 | 0 | 2.471305  | -3.283326 | 2.594317  |
| 31 | 6 | 0 | 1.947493  | 2.059164  | 3.234117  |
| 32 | 1 | 0 | 1.207981  | 3.222088  | -2.731608 |
| 33 | 1 | 0 | 2.831534  | 3.390240  | -3.391762 |
| 34 | 1 | 0 | 2.584640  | 3.443144  | -1.645278 |
| 35 | 1 | 0 | 2.071383  | -2.942714 | -3.016618 |
| 36 | 1 | 0 | 1.612859  | -2.114757 | -4.507224 |
| 37 | 1 | 0 | 0.492185  | -2.176061 | -3.134701 |
| 38 | 1 | 0 | -0.475961 | -0.059767 | -3.569885 |
| 39 | 1 | 0 | 0.335861  | 0.940034  | -4.791194 |
| 40 | 1 | 0 | -0.265760 | 1.657692  | -3.286514 |
| 41 | 1 | 0 | 4.022132  | 1.899715  | 2.706064  |
| 42 | 1 | 0 | 4.072092  | -2.993004 | 1.178938  |
| 43 | 1 | 0 | 4.770410  | 2.475729  | -1.478116 |
| 44 | 1 | 0 | 5.698505  | 1.058764  | -1.975407 |
| 45 | 1 | 0 | 4.941766  | 1.106698  | -0.374587 |
| 46 | 1 | 0 | 4.639108  | -1.746389 | -0.898713 |
| 47 | 1 | 0 | 5.380360  | -1.370060 | -2.458944 |
| 48 | 1 | 0 | 4.147025  | -2.624828 | -2.351850 |
| 49 | 1 | 0 | 5.060696  | 0.127986  | 2.692068  |
| 50 | 1 | 0 | 4.722109  | -1.610936 | 2.703546  |
| 51 | 1 | 0 | 3.817101  | -0.520192 | 3.765667  |
| 52 | 1 | 0 | 3.879818  | 3.182211  | 0.586409  |
| 53 | 1 | 0 | 3.231021  | 4.119732  | 1.953029  |
| 54 | 1 | 0 | 2.125962  | 3.331688  | 0.805031  |
| 55 | 1 | 0 | 0.976194  | 2.111586  | 2.729607  |

|     |   |   |           |           |           |
|-----|---|---|-----------|-----------|-----------|
| 56  | 1 | 0 | 2.068192  | 2.943349  | 3.872826  |
| 57  | 1 | 0 | 1.943110  | 1.169194  | 3.872349  |
| 58  | 1 | 0 | 1.225184  | -3.457765 | 0.180192  |
| 59  | 1 | 0 | 2.512486  | -4.683003 | 0.251639  |
| 60  | 1 | 0 | 2.652720  | -3.295353 | -0.850780 |
| 61  | 1 | 0 | 2.933312  | -2.752123 | 3.430340  |
| 62  | 1 | 0 | 2.675656  | -4.353632 | 2.722484  |
| 63  | 1 | 0 | 1.392311  | -3.127401 | 2.657601  |
| 64  | 1 | 0 | -2.493993 | 3.034360  | 2.298340  |
| 65  | 1 | 0 | -1.401947 | 3.738484  | -1.778567 |
| 66  | 1 | 0 | -3.744293 | 5.178177  | 2.340221  |
| 67  | 1 | 0 | -2.655383 | 5.876963  | -1.756798 |
| 68  | 1 | 0 | -3.831910 | 6.605862  | 0.307614  |
| 69  | 1 | 0 | 0.391637  | 2.952312  | -0.643201 |
| 70  | 6 | 0 | -0.703175 | -1.075103 | -0.853317 |
| 71  | 6 | 0 | -1.724866 | -1.551982 | -1.367325 |
| 72  | 6 | 0 | -2.929819 | -2.109497 | -1.874935 |
| 73  | 6 | 0 | -3.085774 | -2.402891 | -3.241016 |
| 74  | 6 | 0 | -3.999482 | -2.377173 | -0.999332 |
| 75  | 6 | 0 | -4.273670 | -2.946837 | -3.714606 |
| 76  | 1 | 0 | -2.262255 | -2.196225 | -3.918651 |
| 77  | 6 | 0 | -5.181696 | -2.920901 | -1.483466 |
| 78  | 1 | 0 | -3.892747 | -2.126757 | 0.052072  |
| 79  | 6 | 0 | -5.326797 | -3.210175 | -2.839986 |
| 80  | 1 | 0 | -4.378166 | -3.166416 | -4.774360 |
| 81  | 1 | 0 | -6.001135 | -3.105721 | -0.793614 |
| 82  | 1 | 0 | -6.255684 | -3.632961 | -3.214065 |
| 83  | 6 | 0 | -0.754042 | -1.345993 | 1.901382  |
| 84  | 6 | 0 | -1.148520 | -2.673795 | 1.662432  |
| 85  | 6 | 0 | -0.459146 | -1.005472 | 3.243903  |
| 86  | 6 | 0 | -1.260012 | -3.596238 | 2.701934  |
| 87  | 1 | 0 | -1.387390 | -2.971732 | 0.648400  |
| 88  | 6 | 0 | -0.582307 | -1.923228 | 4.275183  |
| 89  | 1 | 0 | -0.136275 | 0.010395  | 3.451346  |
| 90  | 6 | 0 | -0.987919 | -3.235916 | 4.017316  |
| 91  | 1 | 0 | -1.575509 | -4.611628 | 2.471244  |
| 92  | 1 | 0 | -0.351420 | -1.614150 | 5.292668  |
| 93  | 1 | 0 | -1.079388 | -3.958301 | 4.823880  |
| 94  | 6 | 0 | -2.968217 | 0.593984  | 1.072125  |
| 95  | 6 | 0 | -3.520685 | -0.019262 | 2.210855  |
| 96  | 6 | 0 | -3.855225 | 0.908949  | 0.025268  |
| 97  | 6 | 0 | -4.882094 | -0.298037 | 2.294200  |
| 98  | 1 | 0 | -2.871688 | -0.282927 | 3.038252  |
| 99  | 6 | 0 | -5.216985 | 0.645197  | 0.112746  |
| 100 | 1 | 0 | -3.452454 | 1.346485  | -0.883546 |
| 101 | 6 | 0 | -5.742177 | 0.034404  | 1.249280  |
| 102 | 1 | 0 | -5.272894 | -0.776261 | 3.189686  |
| 103 | 1 | 0 | -5.865888 | 0.892372  | -0.723901 |
| 104 | 1 | 0 | -6.804849 | -0.185315 | 1.317181  |

**3a**

298 K, 1 atm, gas phase

Thermal correction to Enthalpy = 0.935255

Thermal correction to Gibbs Free Energy = 0.795281

Sum of electronic and thermal Enthalpies = -2024.167505

Sum of electronic and thermal Free Energies = -2024.307478

298 K, in THF

Sum of electronic and thermal Free Energies = -3221.028175

Standard orientation:

| Center<br>Number | Atomic<br>Number | Atomic<br>Type | Coordinates (Angstroms) |           |           |
|------------------|------------------|----------------|-------------------------|-----------|-----------|
|                  |                  |                | X                       | Y         | Z         |
| 1                | 71               | 0              | 1.233700                | -0.237033 | -0.499196 |
| 2                | 7                | 0              | -0.789253               | -1.223496 | -0.878460 |
| 3                | 1                | 0              | -0.776984               | -2.115362 | -1.359342 |
| 4                | 7                | 0              | 0.766205                | 1.329437  | -2.212835 |
| 5                | 7                | 0              | 2.074102                | 1.993580  | -0.516544 |
| 6                | 6                | 0              | 0.707529                | -0.340935 | 1.953348  |
| 7                | 6                | 0              | -0.306764               | 0.352694  | 1.603516  |
| 8                | 6                | 0              | -1.302546               | 0.978306  | 0.930594  |
| 9                | 6                | 0              | -2.380599               | 0.127466  | 0.353083  |
| 10               | 6                | 0              | -2.043647               | -0.967307 | -0.432073 |
| 11               | 6                | 0              | 1.115634                | -1.040496 | 3.153738  |
| 12               | 6                | 0              | 0.545815                | -2.287647 | 3.471289  |
| 13               | 1                | 0              | -0.231196               | -2.680496 | 2.821611  |
| 14               | 6                | 0              | 0.968881                | -3.006130 | 4.583263  |
| 15               | 1                | 0              | 0.511602                | -3.968456 | 4.802104  |
| 16               | 6                | 0              | 1.965949                | -2.501639 | 5.417652  |
| 17               | 1                | 0              | 2.297603                | -3.065717 | 6.285207  |
| 18               | 6                | 0              | 2.530670                | -1.262501 | 5.120304  |
| 19               | 1                | 0              | 3.307554                | -0.851921 | 5.761460  |
| 20               | 6                | 0              | 2.118152                | -0.543717 | 4.004221  |
| 21               | 1                | 0              | 2.577834                | 0.412237  | 3.772409  |
| 22               | 6                | 0              | -1.381020               | 2.450346  | 0.937624  |
| 23               | 6                | 0              | -0.490473               | 3.220338  | 1.708518  |
| 24               | 1                | 0              | 0.237066                | 2.704021  | 2.327031  |
| 25               | 6                | 0              | -0.525709               | 4.607702  | 1.695029  |
| 26               | 1                | 0              | 0.189310                | 5.164509  | 2.296660  |
| 27               | 6                | 0              | -1.472146               | 5.285583  | 0.924402  |
| 28               | 1                | 0              | -1.504096               | 6.371842  | 0.914338  |
| 29               | 6                | 0              | -2.383871               | 4.539928  | 0.180386  |
| 30               | 1                | 0              | -3.140233               | 5.043762  | -0.417095 |
| 31               | 6                | 0              | -2.343573               | 3.149000  | 0.188094  |
| 32               | 1                | 0              | -3.064138               | 2.588848  | -0.396169 |
| 33               | 6                | 0              | -3.762423               | 0.432658  | 0.749651  |
| 34               | 6                | 0              | -4.038722               | 0.929176  | 2.038736  |
| 35               | 1                | 0              | -3.211529               | 1.053012  | 2.732328  |

|    |   |   |           |           |           |
|----|---|---|-----------|-----------|-----------|
| 36 | 6 | 0 | -5.331090 | 1.251859  | 2.433588  |
| 37 | 1 | 0 | -5.503400 | 1.626419  | 3.440349  |
| 38 | 6 | 0 | -6.402111 | 1.097035  | 1.554892  |
| 39 | 1 | 0 | -7.413006 | 1.351549  | 1.862912  |
| 40 | 6 | 0 | -6.148998 | 0.627456  | 0.266390  |
| 41 | 1 | 0 | -6.966107 | 0.519011  | -0.443682 |
| 42 | 6 | 0 | -4.855748 | 0.315657  | -0.132819 |
| 43 | 1 | 0 | -4.674336 | -0.018178 | -1.149900 |
| 44 | 6 | 0 | -3.052598 | -2.010593 | -0.784167 |
| 45 | 6 | 0 | -3.797568 | -2.663674 | 0.204482  |
| 46 | 1 | 0 | -3.680414 | -2.347785 | 1.236659  |
| 47 | 6 | 0 | -4.677534 | -3.687203 | -0.129296 |
| 48 | 1 | 0 | -5.245588 | -4.184401 | 0.652987  |
| 49 | 6 | 0 | -4.833148 | -4.076404 | -1.458735 |
| 50 | 1 | 0 | -5.524042 | -4.874366 | -1.718747 |
| 51 | 6 | 0 | -4.093200 | -3.437382 | -2.451223 |
| 52 | 1 | 0 | -4.208393 | -3.731286 | -3.491740 |
| 53 | 6 | 0 | -3.205382 | -2.419773 | -2.115018 |
| 54 | 1 | 0 | -2.628356 | -1.917466 | -2.887903 |
| 55 | 6 | 0 | -0.171777 | 1.505503  | -3.303295 |
| 56 | 1 | 0 | 0.191201  | 2.291327  | -3.990420 |
| 57 | 6 | 0 | -0.245281 | 0.205891  | -4.097591 |
| 58 | 1 | 0 | 0.734121  | -0.067880 | -4.496677 |
| 59 | 1 | 0 | -0.952612 | 0.293233  | -4.930088 |
| 60 | 1 | 0 | -0.583086 | -0.591865 | -3.427417 |
| 61 | 6 | 0 | -1.573169 | 1.891747  | -2.830785 |
| 62 | 1 | 0 | -1.938847 | 1.143350  | -2.119877 |
| 63 | 1 | 0 | -2.271006 | 1.949981  | -3.675646 |
| 64 | 1 | 0 | -1.574240 | 2.856732  | -2.319824 |
| 65 | 6 | 0 | 1.282314  | 2.348353  | -1.531564 |
| 66 | 6 | 0 | 0.932372  | 3.790365  | -1.814304 |
| 67 | 1 | 0 | 0.531304  | 3.920462  | -2.820403 |
| 68 | 1 | 0 | 1.793251  | 4.450124  | -1.696040 |
| 69 | 1 | 0 | 0.167865  | 4.111170  | -1.097070 |
| 70 | 6 | 0 | 2.729283  | 2.988387  | 0.306184  |
| 71 | 1 | 0 | 2.049252  | 3.830233  | 0.518163  |
| 72 | 6 | 0 | 3.100348  | 2.359870  | 1.644437  |
| 73 | 1 | 0 | 2.211787  | 1.958949  | 2.135655  |
| 74 | 1 | 0 | 3.582835  | 3.087825  | 2.306515  |
| 75 | 1 | 0 | 3.791576  | 1.523567  | 1.488051  |
| 76 | 6 | 0 | 3.994287  | 3.547449  | -0.358296 |
| 77 | 1 | 0 | 4.734264  | 2.750684  | -0.479245 |
| 78 | 1 | 0 | 4.440613  | 4.342675  | 0.251775  |
| 79 | 1 | 0 | 3.786466  | 3.957071  | -1.351474 |
| 80 | 6 | 0 | 3.286394  | -1.866294 | 0.029733  |
| 81 | 6 | 0 | 3.734686  | -1.031946 | -1.029042 |
| 82 | 6 | 0 | 2.992745  | -1.352654 | -2.194490 |
| 83 | 6 | 0 | 2.076056  | -2.384345 | -1.858781 |
| 84 | 6 | 0 | 2.252027  | -2.698482 | -0.481494 |
| 85 | 6 | 0 | 3.900528  | -1.934187 | 1.393854  |

|     |   |   |          |           |           |
|-----|---|---|----------|-----------|-----------|
| 86  | 1 | 0 | 4.099644 | -0.939070 | 1.806460  |
| 87  | 1 | 0 | 4.857925 | -2.473271 | 1.370935  |
| 88  | 1 | 0 | 3.251314 | -2.441370 | 2.110644  |
| 89  | 6 | 0 | 4.890963 | -0.083914 | -0.992187 |
| 90  | 1 | 0 | 4.699424 | 0.797320  | -1.611290 |
| 91  | 1 | 0 | 5.811631 | -0.558274 | -1.362956 |
| 92  | 1 | 0 | 5.096717 | 0.265949  | 0.024025  |
| 93  | 6 | 0 | 3.236799 | -0.755372 | -3.546698 |
| 94  | 1 | 0 | 2.657497 | -1.272574 | -4.317178 |
| 95  | 1 | 0 | 4.295371 | -0.834645 | -3.826913 |
| 96  | 1 | 0 | 2.960238 | 0.305279  | -3.580558 |
| 97  | 6 | 0 | 1.185009 | -3.120868 | -2.812428 |
| 98  | 1 | 0 | 0.368595 | -3.631859 | -2.290531 |
| 99  | 1 | 0 | 1.738549 | -3.898312 | -3.357305 |
| 100 | 1 | 0 | 0.734968 | -2.459108 | -3.558671 |
| 101 | 6 | 0 | 1.518613 | -3.770397 | 0.265437  |
| 102 | 1 | 0 | 1.618980 | -3.640067 | 1.346042  |
| 103 | 1 | 0 | 1.893973 | -4.772395 | 0.014994  |
| 104 | 1 | 0 | 0.445462 | -3.755813 | 0.043667  |

### 3a'

298 K, 1 atm, gas phase

Thermal correction to Enthalpy = 0.934630

Thermal correction to Gibbs Free Energy = 0.791634

Sum of electronic and thermal Enthalpies = -2024.146441

Sum of electronic and thermal Free Energies = -2024.289436

298 K, in THF

Sum of electronic and thermal Free Energies = -3221.015814

Standard orientation:

| Center<br>Number | Atomic<br>Number | Atomic<br>Type | Coordinates (Angstroms) |           |           |
|------------------|------------------|----------------|-------------------------|-----------|-----------|
|                  |                  |                | X                       | Y         | Z         |
| 1                | 71               | 0              | -0.193483               | -1.055746 | -0.466969 |
| 2                | 6                | 0              | 0.203559                | 0.953003  | 1.097309  |
| 3                | 7                | 0              | 2.029372                | -0.826457 | -0.068881 |
| 4                | 6                | 0              | 2.427073                | 0.460951  | 0.111786  |
| 5                | 6                | 0              | 1.493388                | 1.423755  | 0.495191  |
| 6                | 6                | 0              | 3.887935                | 0.743565  | 0.024599  |
| 7                | 6                | 0              | 4.516641                | 1.587092  | 0.953548  |
| 8                | 6                | 0              | 5.891171                | 1.782311  | 0.924656  |
| 9                | 6                | 0              | 6.676851                | 1.133648  | -0.028515 |
| 10               | 6                | 0              | 6.069737                | 0.280069  | -0.945347 |
| 11               | 6                | 0              | 4.692356                | 0.080934  | -0.912416 |
| 12               | 7                | 0              | -1.945276               | -2.332417 | 0.549192  |
| 13               | 6                | 0              | -1.203244               | -3.431503 | 0.625156  |
| 14               | 6                | 0              | -1.715904               | -4.747281 | 1.170133  |
| 15               | 7                | 0              | 0.038671                | -3.310045 | 0.156323  |



|    |   |   |           |           |           |
|----|---|---|-----------|-----------|-----------|
| 16 | 6 | 0 | 1.074414  | -4.252356 | 0.523863  |
| 17 | 6 | 0 | 2.111154  | -4.361201 | -0.589624 |
| 18 | 6 | 0 | -0.382997 | 0.416387  | -2.688764 |
| 19 | 6 | 0 | -1.686254 | -0.142106 | -2.558992 |
| 20 | 6 | 0 | -1.579825 | -1.546258 | -2.737548 |
| 21 | 6 | 0 | -0.215968 | -1.853543 | -2.999335 |
| 22 | 6 | 0 | 0.522401  | -0.639569 | -2.982405 |
| 23 | 6 | 0 | -0.081177 | 1.883471  | -2.686363 |
| 24 | 6 | 0 | -2.937100 | 0.674641  | -2.445420 |
| 25 | 6 | 0 | -2.685037 | -2.557225 | -2.763910 |
| 26 | 6 | 0 | 0.282591  | -3.210304 | -3.385826 |
| 27 | 6 | 0 | 1.967133  | -0.477657 | -3.331471 |
| 28 | 6 | 0 | -3.342385 | -2.311314 | 0.938790  |
| 29 | 6 | 0 | -3.976753 | -1.032651 | 0.409559  |
| 30 | 6 | 0 | -3.533467 | -2.386334 | 2.457001  |
| 31 | 6 | 0 | 1.723474  | -3.831584 | 1.845948  |
| 32 | 1 | 0 | 2.418898  | 0.350669  | -2.778509 |
| 33 | 1 | 0 | 2.103133  | -0.277029 | -4.403380 |
| 34 | 1 | 0 | 2.540808  | -1.378450 | -3.090178 |
| 35 | 1 | 0 | -3.825365 | 0.083681  | -2.689605 |
| 36 | 1 | 0 | -2.904830 | 1.516280  | -3.148012 |
| 37 | 1 | 0 | -3.085342 | 1.105303  | -1.451743 |
| 38 | 1 | 0 | -0.541408 | 2.392832  | -1.834519 |
| 39 | 1 | 0 | -0.452697 | 2.363827  | -3.603124 |
| 40 | 1 | 0 | 0.991871  | 2.076136  | -2.625626 |
| 41 | 1 | 0 | 0.655302  | -5.262196 | 0.666118  |
| 42 | 1 | 0 | -3.883250 | -3.160036 | 0.480679  |
| 43 | 1 | 0 | 1.371755  | -3.276166 | -3.314421 |
| 44 | 1 | 0 | 0.007957  | -3.456186 | -4.421956 |
| 45 | 1 | 0 | -0.136447 | -3.988931 | -2.739717 |
| 46 | 1 | 0 | -2.580017 | -3.302074 | -1.965863 |
| 47 | 1 | 0 | -2.702670 | -3.099583 | -3.718646 |
| 48 | 1 | 0 | -3.663905 | -2.086113 | -2.637420 |
| 49 | 1 | 0 | -1.370315 | -5.575463 | 0.545784  |
| 50 | 1 | 0 | -2.805267 | -4.772935 | 1.204214  |
| 51 | 1 | 0 | -1.338051 | -4.915101 | 2.184217  |
| 52 | 1 | 0 | 1.675372  | -4.812385 | -1.484357 |
| 53 | 1 | 0 | 2.964563  | -4.970770 | -0.272476 |
| 54 | 1 | 0 | 2.477751  | -3.368552 | -0.868181 |
| 55 | 1 | 0 | 2.147623  | -2.827640 | 1.749433  |
| 56 | 1 | 0 | 2.512712  | -4.531438 | 2.147779  |
| 57 | 1 | 0 | 0.978326  | -3.780646 | 2.646598  |
| 58 | 1 | 0 | -3.429028 | -0.158077 | 0.778524  |
| 59 | 1 | 0 | -5.021954 | -0.945790 | 0.725201  |
| 60 | 1 | 0 | -3.940520 | -1.005417 | -0.679497 |
| 61 | 1 | 0 | -3.091009 | -3.288391 | 2.888201  |
| 62 | 1 | 0 | -4.599719 | -2.372810 | 2.713533  |
| 63 | 1 | 0 | -3.046238 | -1.530740 | 2.928919  |
| 64 | 1 | 0 | 3.904556  | 2.084635  | 1.699258  |
| 65 | 1 | 0 | 4.220482  | -0.583394 | -1.630050 |

|     |   |   |           |           |           |
|-----|---|---|-----------|-----------|-----------|
| 66  | 1 | 0 | 6.354660  | 2.439890  | 1.655812  |
| 67  | 1 | 0 | 6.670020  | -0.235140 | -1.691495 |
| 68  | 1 | 0 | 7.752900  | 1.286667  | -0.049316 |
| 69  | 1 | 0 | 2.803956  | -1.476564 | -0.036259 |
| 70  | 6 | 0 | -0.979866 | 1.643342  | 0.792218  |
| 71  | 6 | 0 | -2.023621 | 2.258249  | 0.572771  |
| 72  | 6 | 0 | -3.196860 | 2.992179  | 0.315753  |
| 73  | 6 | 0 | -4.375354 | 2.780921  | 1.066816  |
| 74  | 6 | 0 | -3.239971 | 3.958091  | -0.715934 |
| 75  | 6 | 0 | -5.531838 | 3.496941  | 0.793391  |
| 76  | 1 | 0 | -4.362586 | 2.040830  | 1.861657  |
| 77  | 6 | 0 | -4.403275 | 4.665795  | -0.978331 |
| 78  | 1 | 0 | -2.341963 | 4.134454  | -1.300313 |
| 79  | 6 | 0 | -5.560830 | 4.444903  | -0.229967 |
| 80  | 1 | 0 | -6.424720 | 3.310962  | 1.386188  |
| 81  | 1 | 0 | -4.407598 | 5.401503  | -1.779405 |
| 82  | 1 | 0 | -6.469606 | 5.001582  | -0.441300 |
| 83  | 6 | 0 | 0.234061  | 0.257078  | 2.404618  |
| 84  | 6 | 0 | -0.939065 | 0.079417  | 3.168655  |
| 85  | 6 | 0 | 1.427991  | -0.247859 | 2.963498  |
| 86  | 6 | 0 | -0.923277 | -0.567585 | 4.397204  |
| 87  | 1 | 0 | -1.870354 | 0.486376  | 2.784649  |
| 88  | 6 | 0 | 1.437287  | -0.899140 | 4.191165  |
| 89  | 1 | 0 | 2.358577  | -0.112823 | 2.426210  |
| 90  | 6 | 0 | 0.264524  | -1.075205 | 4.922426  |
| 91  | 1 | 0 | -1.852757 | -0.670704 | 4.953850  |
| 92  | 1 | 0 | 2.381784  | -1.273944 | 4.580398  |
| 93  | 1 | 0 | 0.276247  | -1.586170 | 5.881565  |
| 94  | 6 | 0 | 1.720138  | 2.864566  | 0.358427  |
| 95  | 6 | 0 | 1.128570  | 3.776959  | 1.255796  |
| 96  | 6 | 0 | 2.500527  | 3.412011  | -0.680837 |
| 97  | 6 | 0 | 1.334321  | 5.145516  | 1.139715  |
| 98  | 1 | 0 | 0.503291  | 3.390595  | 2.054676  |
| 99  | 6 | 0 | 2.715235  | 4.779513  | -0.788700 |
| 100 | 1 | 0 | 2.941147  | 2.742054  | -1.413409 |
| 101 | 6 | 0 | 2.133946  | 5.662344  | 0.120726  |
| 102 | 1 | 0 | 0.863011  | 5.816807  | 1.854179  |
| 103 | 1 | 0 | 3.326844  | 5.160739  | -1.603621 |
| 104 | 1 | 0 | 2.287537  | 6.734377  | 0.027059  |

---

## 5) References

- (1) Lv, Z.-J.; Chai, Z.; Zhu, M.; Wei, J.; Zhang, W.-X. Selective Coupling of Lanthanide Metallacycloprenes and Nitriles via Azametallacyclopentadiene and  $\eta^2$ -Pyrimidine Metallacycle. *J. Am. Chem. Soc.* **2021**, *143*, 9151–9161.
- (2) Dolomanov, O. V.; Bourhis, L. J.; Gildea, R. J.; Howard, J. A. K.; Puschmann, H. OLEX2: A Complete Structure Solution, Refinement and Analysis Program. *J. Appl. Cryst.* **2009**, *42*, 339–341.
- (3) Palatinus, L.; Prathapa, S. J.; van Smaalen, S. EDMA: A Computer Program for Topological Analysis of Discrete Electron Densities. *J. Appl. Cryst.* **2012**, *45*, 575–580.
- (4) Sheldrick, G. M. A Short History of SHELX. *Acta Cryst.* **2008**, *A64*, 112–122.
- (5) Sheldrick, G.M. Crystal Structure Refinement with SHELXL. *Acta Cryst.* **2015**, *C71*, 3–8.
- (6) Frisch, M. J.; Trucks, G. W.; Schlegel, H. B.; Scuseria, G. E.; Robb, M. A.; Cheeseman, J. R.; Scalmani, G.; Barone, V.; Petersson, G. A.; Nakatsuji, H.; Li, X.; Caricato, M.; Marenich, A.V.; Bloino, J.; Janesko, B. G.; Gomperts, R.; Mennucci, B.; Hratchian, H. P.; Ortiz, J. V.; Izmaylov, A. F.; Sonnenberg, J. L.; Williams-Young, D.; Ding, F.; Lipparini, F.; Egidi, F.; Goings, J.; Peng, B.; Petrone, A.; Henderson, T.; Ranasinghe, D.; Zakrzewski, V. G.; Gao, J.; Rega, N.; Zheng, G.; Liang, W.; Hada, M.; Ehara, M.; Toyota, K.; Fukuda, R.; Hasegawa, J.; Ishida, M.; Nakajima, T.; Honda, Y.; Kitao, O.; Nakai, H.; Vreven, T.; Throssell, K.; Montgomery, J. A., Jr.; Peralta, J. E.; Ogliaro, F.; Bearpark, M. J.; Heyd, J. J.; Brothers, E. N.; Kudin, K. N.; Staroverov, V. N.; Keith, T. A.; Kobayashi, R.; Normand, J.; Raghavachari, K.; Rendell, A. P.; Burant, J. C.; Iyengar, S. S.; Tomasi, J.; Cossi, M.; Millam, J. M.; Klene, M.; Adamo, C.; Cammi, R.; Ochterski, J. W.; Martin, R. L.; Morokuma, K.; Farkas, O.; Foresman, J. B.; Fox, D. J. *Gaussian 16, Revision C.01*, Gaussian, Inc., Wallingford CT, 2019.
- (7) Adamo, C.; Barone, V. Toward Reliable Density Functional Methods without Adjustable Parameters: The PBE0 Model. *J. Chem. Phys.* **1999**, *110*, 6158–6170.
- (8) Grimme, S.; Antony, J.; Ehrlich, S.; Krieg, H. A Consistent and Accurate Ab Initio Parametrization of Density Functional Dispersion Correction (DFT-D) for the 94 Elements H-Pu. *J. Chem. Phys.* **2010**, *132*, 154104.
- (9) Andrae, D.; Häußermann, U.; Dolg, M.; Stoll, H.; Preuß, H. Energy-Adjusted Ab Initio Pseudopotentials for the Second and Third Row Transition Elements. *Theor. Chim. Acta* **1990**, *77*, 123–141.
- (10) Krishnan, R.; Binkley, J. S.; Seeger, R.; Pople, J. A. Self - Consistent Molecular Orbital Methods. XX. A Basis Set for Correlated Wave Functions. *J. Chem. Phys.* **1980**, *72*, 650–654.
- (11) Marenich, A. V.; Cramer, C. J.; Truhlar, D. G. Universal Solvation Model Based on

Solute Electron Density and on a Continuum Model of the Solvent Defined by the Bulk Dielectric Constant and Atomic Surface Tensions. *J. Phys. Chem. B* **2009**, *113*, 6378–6396.

(12) Frisch, M. J.; Pople, J. A.; Binkley, J. S. Self - Consistent Molecular Orbital Methods 25. Supplementary Functions for Gaussian Basis Sets. *J. Chem. Phys.* **1984**, *80*, 3265–3269.

(13) (a) Zhang, J.-X.; Sheong, F. K.; Lin, Z. Unravelling Chemical Interactions with Principal Interacting Orbital Analysis, *Chem. Eur. J.* **2018**, *24*, 9639–9650; (b) Zhang, J.-X.; Sheong, F. K.; Lin, Z. Principal Interacting Orbital: A Chemically Intuitive Method for Deciphering Bonding Interaction, *WIREs Comput. Mol. Sci.* **2020**, *10*, e1469.
